1 **Sex and APOE genotype influence AD neuropathology but not epigenetic age across**  
2 **diagnosis**

3  
4 Paula Duarte-Guterman<sup>1\*</sup>, Amy M. Inkster<sup>2,3\*</sup>, Arianne Y. Albert<sup>4</sup>, Cindy Barha<sup>5</sup>, Wendy P.  
5 Robinson<sup>2,3</sup>, Liisa A.M. Galea<sup>1</sup>, on behalf of the Alzheimer's Disease Neuroimaging Initiative<sup>δ</sup>

6  
7 1. Djavad Mowafaghian Centre for Brain Health and Department of Psychology, University of  
8 British Columbia, Vancouver, BC, Canada

9 2. Department of Medical Genetics, University of British Columbia, Vancouver, BC, Canada.

10 3. BC Children's Hospital Research Institute, Vancouver, BC, Canada

11 4. Women's Health Research Institute of British Columbia, Vancouver, BC, Canada

12 5. Djavad Mowafaghian Centre for Brain Health and Department of Physical Therapy,  
13 University of British Columbia, Vancouver, BC, Canada

14  
15  
16 Address all correspondence and requests for reprints to:

17 L. A. M. Galea, PhD  
18 Djavad Mowafaghian Centre for Brain Health  
19 2215 Wesbrook Mall  
20 Vancouver, British Columbia  
21 V6T 1Z3, Canada  
22 E-mail: [lgalea@psych.ubc.ca](mailto:lgalea@psych.ubc.ca).

23  
24  
25 \* Considered co-first authors.

26  
27  
28 <sup>δ</sup> Data used in preparation of this article were obtained from the Alzheimer's Disease  
29 Neuroimaging Initiative (ADNI) database ([adni.loni.usc.edu](http://adni.loni.usc.edu)). As such, the investigators within  
30 the ADNI contributed to the design and implementation of ADNI and/or provided data but did  
31 not participate in analysis or writing of this report. A complete listing of ADNI investigators can  
32 be found at: [http://adni.loni.usc.edu/wp-](http://adni.loni.usc.edu/wp-content/uploads/how_to_apply/ADNI_Acknowledgement_List.pdf)  
33 [content/uploads/how\\_to\\_apply/ADNI\\_Acknowledgement\\_List.pdf](http://adni.loni.usc.edu/wp-content/uploads/how_to_apply/ADNI_Acknowledgement_List.pdf)

34 **Abstract**

35 **Introduction:** Alzheimer's disease (AD) disproportionately affects females. We determined  
36 whether physiological biomarkers (neuroplasticity, immune, stress, epigenetic) explain why  
37 females are more susceptible to AD than males using the Alzheimer's Disease Neuroimaging  
38 Initiative (ADNI) database.

39 **Methods:** Using the complete ADNI cohort, we analysed the effect of sex and APOE genotype  
40 (number of  $\epsilon 4$  alleles) and sex and diagnosis (cognitively normal (CN), mild cognitive  
41 impairment (MCI), AD) on (1) AD related endpoints: memory scores, executive function scores,  
42 hippocampal volume, cerebrospinal fluid (CSF) amyloid beta, tau and p-tau; (2) markers of the  
43 immune system (interleukins, C-reactive protein, and immunoglobulins), neuroplasticity  
44 (intercellular adhesion molecule, ICAM1), and stress (cortisol); and (3) epigenetic age.

45 **Results:** Females had higher levels of tau and p-tau compared to males and increasing alleles of  
46 APOE $\epsilon 4$  disproportionately increased tau and p-tau compared to males. Females had larger  
47 hippocampal volume (corrected with intracranial volume) and better memory scores (that include  
48 verbal memory) than males, regardless of APOE genotype and diagnosis. There were also sex  
49 differences in biomarkers with females having higher levels of plasma C-reactive protein and  
50 lower levels of CSF IL-8, IL-16, immunoglobulin A, and ICAM1. We did not observe an  
51 association between sex, diagnosis, or APOE genotype and blood epigenetic age acceleration or  
52 intrinsic epigenetic age acceleration.

53 **Conclusion:** In females tau pathology was increased but memory scores were higher and  
54 corrected hippocampal volume were larger compared to males suggesting females have a reserve  
55 against brain damage that delays either the onset of cognitive decline or diagnosis. In this ADNI  
56 cohort more males than females were diagnosed with MCI but with no significant difference in

57 AD diagnosis, although more females presented with AD, suggesting the progression from CN,  
58 MCI to AD may be sex-specific. We found sex differences in immune biomarkers indicating that  
59 the underlying physiology may participate in differential aging with and without a diagnosis of  
60 AD or MCI between the sexes.

61

62 **Keywords:** Sex differences, inflammation, epigenetic age, hippocampus

63

## 64 **Introduction**

65 Alzheimer's disease (AD) is a neurodegenerative disease characterized by severe  
66 cognitive decline (Alzheimer's Association, 2017). Modifiable risk factors associated with AD  
67 include stress (Caruso et al., 2018), sociocultural or lifestyle factors (e.g., education, marital  
68 status, exercise), and conditions (diabetes, obesity, and cardiovascular disease; Baumgart et al.,  
69 2015; Nebel et al., 2018; Xu et al., 2015). Non-modifiable risk factors include age, biological  
70 sex, and APOE genotype (Riedel et al., 2016). Females are more likely to be diagnosed with AD  
71 in Europe and Asia, although this sex difference may depend in part on geographic location as  
72 the sex difference is not always observed in studies from the United States (reviewed by Ferretti  
73 et al., 2018; Mielke et al., 2014; Nebel et al., 2018). Nevertheless, regardless of prevalence,  
74 females show greater neuropathology (brain atrophy, neurofibrillary tangles) and cognitive  
75 decline with AD than males in both Europe and the United States (Ardekani et al., 2016; Barnes  
76 et al., 2005; Holland et al., 2013; Hua et al., 2010; Irvine et al., 2012; Koran and Hohman, 2017;  
77 Lin et al., 2015).

78           The hippocampus is one of the first brain areas to show atrophy with AD (Apostolova et  
79 al., 2006; Jack et al., 2000; Kidron et al., 1997) and hippocampal atrophy correlates with  
80 cognitive decline (Petersen et al., 2000) and AD pathology (neurofibrillary tangles; Jack et al.,  
81 2002). Previous studies using the Alzheimer’s Disease Neuroimaging Initiative (ADNI) indicate  
82 that females have greater atrophy rates and cognitive decline than males with AD (Holland et al.,  
83 2013; Hua et al., 2010; Lin et al., 2015). However, there is limited research into the role of sex in  
84 the possible mechanisms underlying AD. In addition, few studies have examined the interaction  
85 of genetic polymorphisms and biological sex in AD. The  $\epsilon 4$  allele of the APOE gene is a well-  
86 known genetic risk factor of AD (Corder et al., 1993) and is associated with accumulation of  
87 amyloid beta protein (Ossenkoppele et al., 2015). In females between 65 and 75 years, one allele  
88 of  $\epsilon 4$  increases the risk of AD by 4-fold relative to males, indicating that the APOE genotype  
89 affects males and females differently (meta-analysis by Neu et al., 2017). Understanding why  
90 females are at a higher risk and have a higher burden of the disease is important for the  
91 development of tailored treatments based on sex and genetics.

92           Chronic inflammation is a hallmark of AD, as evidenced by increased expression of  
93 proinflammatory cytokines in the brains of AD patients which can exacerbate AD pathology  
94 (Heppner et al., 2015; Kinney et al., 2018; Swardfager et al., 2010). There are sex differences in  
95 immune responses (Klein and Flanagan, 2016) which can affect neuroplasticity (Dantzer, 2018;  
96 de Miranda et al., 2017) and interact with stress (Dantzer, 2018), but it is not known how these  
97 may be related to sex differences in AD. Biomarkers are highly sought after to predict disease  
98 onset and progression and to understand the possible underlying mechanisms of AD to develop  
99 better treatments. Therefore, the first objective of this study was to investigate potential

100 physiological biomarkers (neuroplasticity, immune, stress) that may explain sex differences in  
101 AD and in people at risk for AD using the ADNI database.

102         Aging biomarkers also include epigenetic alterations, and these have been associated with  
103 a variety of pathologies and adverse health conditions, including normal cognitive aging and  
104 neurodegenerative phenotypes such as AD (Hannum et al., 2013; Horvath, 2013; Levine et al.,  
105 2015; Yokoyama et al., 2017). Recently, molecular biomarkers of aging known as “epigenetic  
106 clocks” have been developed based on DNA methylation signatures (Hannum et al., 2013;  
107 Horvath, 2013). Epigenetic age or “DNAmAge” is a measure of the biological age of a sample  
108 (cell or tissue), and can be calculated across a range of tissues and time points, providing an  
109 accurate estimation of a sample’s chronological age based on the presence or absence of  
110 methylation at the 5’ carbon of informative CpG dinucleotides throughout the human genome  
111 (Horvath, 2013). Positive deviations of epigenetic age from chronological age (positive  
112 epigenetic age acceleration) reflect more rapid biological aging and have been associated with  
113 numerous factors including smoking, obesity, Parkinson’s disease, Trisomy 21, and cancer (Gale  
114 et al., 2018; Horvath, 2013; Horvath et al., 2015; Horvath and Ritz, 2015), while negative  
115 deviations of epigenetic age from chronological age (negative epigenetic age acceleration) have  
116 been associated with high life-expectancy populations and memory retention (Degerman et al.,  
117 2017; McEwen et al., 2017). In AD, epigenetic age acceleration of the frontal cortex was  
118 associated with amyloid load, neuritic plates, and cognitive decline (Levine et al., 2015). Intra-  
119 individual DNA methylation profiles in peripheral tissue are correlated with the epigenetic  
120 signature in the brain, likely due both to identical genetic background affecting DNAm, and  
121 common signatures of epigenetic aging (Braun et al., 2019), thus it is reasonable to hypothesize  
122 that epigenetic age acceleration may also be detectable in peripheral tissues such as blood in AD

123 participants. In healthy individuals, aging males exhibit more positive epigenetic age  
124 acceleration than females in blood and buccal tissue, and multiple brain regions (Horvath et al.,  
125 2016); in AD and other diseases with a sex difference, it is possible that the underlying sex-  
126 specific pathological mechanisms may be reflected in epigenetic age acceleration measures – for  
127 example, in AD females could potentially have more positive epigenetic age acceleration than  
128 males.

129 Our aims were to first examine sex differences in cognitive ability, volume of the  
130 hippocampus, neuropathological markers of AD and the potential underlying physiological  
131 mechanisms (neuroplasticity, immune, stress) and how these may be affected by APOE genotype  
132 (number of  $\epsilon 4$  alleles), and secondly by dementia status (cognitively healthy (CN), mild  
133 cognitive impairment (MCI), AD). Our third objective was to investigate epigenetic age in  
134 peripheral tissue of CN, MCI and AD participants, and to study the relationship between sex,  
135 APOE genotype, dementia status, and epigenetic age acceleration.

136

## 137 **Methods**

### 138 *ADNI database*

139 Data used in the preparation of this article were obtained from the Alzheimer's Disease  
140 Neuroimaging Initiative (ADNI) database ([adni.loni.usc.edu](http://adni.loni.usc.edu)). The ADNI was launched in  
141 2003 as a public-private partnership, led by Principal Investigator Michael W. Weiner,  
142 MD. The primary goal of ADNI has been to test whether serial magnetic resonance imaging  
143 (MRI), positron emission tomography (PET), other biological markers, and clinical and  
144 neuropsychological assessment can be combined to measure the progression of mild cognitive

145 impairment (MCI) and early Alzheimer's disease (AD). For up-to-date information, see  
146 [www.adni-info.org](http://www.adni-info.org). Data used in this article were downloaded on or before Jan 16, 2019.

147

148 *Statistical Methods: Sex and APOE genotype and sex and diagnosis*

149 We included all participants that had a baseline diagnosis in the ADNI database (total n =  
150 1,460, n= 630 females, n=830 males). Data included in our analyses were: demographics (age,  
151 years of education, and ethnicity), baseline diagnosis (cognitively normal, CN; early MCI,  
152 EMCI; late MCI, LMCI; or AD), number of APOE  $\epsilon$ 4 alleles (0, 1 or 2), ADNI executive  
153 function Z-scores, ADNI memory Z-scores (using data from the ADNI neuropsychological  
154 battery and validated in Crane et al., 2012; Gibbons et al., 2012), hippocampal volume ( $\text{mm}^3$ ),  
155 cerebrospinal fluid (CSF) amyloid beta (pg/ml), CSF tau (pg/ml), and CSF p-tau (pg/ml). The  
156 executive function score included WAIS-R Digit Symbol Substitution, Digit Span Backwards,  
157 Trails A and B, Category Fluency, and Clock Drawing (Gibbons et al., 2012). The composite  
158 memory score included Rey Auditory Verbal Learning Test, AD Assessment Schedule -  
159 Cognition, Mini-Mental State Examination, and Logical Memory data (Crane et al., 2012). A  
160 small subset of participants also had inflammatory markers measured in CSF (N = 279), and  
161 plasma (N = 527) listed in Table 2A. Hippocampal volume was divided by intracranial volume to  
162 correct for differences in brain size, as sex differences in hippocampal volume are influence by  
163 intracranial volume (Lotze et al., 2019; Tan et al., 2016) and is presented as a ratio.

164 We compared all available data for each study variable between the sexes using the  
165 Wilcoxon rank sum test for continuous variables and Fisher's exact test for categorical variables.  
166 We used general linear models to determine the relationships between (1) sex and APOE  
167 genotype or (2) sex and dementia diagnosis and cognitive ability, corrected hippocampal volume,

168 and biomarkers. All models included age as a covariate. To test the main question, all models  
169 initially included an interaction between sex and APOE genotype or sex and dementia diagnosis;  
170 if this interaction was not significant, it was removed from the model to estimate the main effects  
171 of sex and APOE genotype or diagnosis. Significance was based on the likelihood ratio test, and  
172 all p-values for comparisons of sex and either APOE or diagnosis for all outcomes combined  
173 were corrected for multiple testing using the Benjamini-Hochberg false discovery rate method  
174 (Benjamini and Hochberg, 1995). All regression analyses were carried out in R v3.5.1 (R Core  
175 Team 2018).

176

### 177 *Statistical Methods: Epigenetic Age*

178 We used DNAm data quantified with the Illumina Infinium HumanMethylationEPIC  
179 BeadChip array (“EPIC” array) for 1905 blood samples from 640 unique ADNI participants  
180 (n=284 females, n= 356 males; Vasanthakumar et al., 2017) with CN, MCI and AD diagnosis.  
181 DNAm IDAT files were read into R v3.5.1 (R Core Team, 2018) using the ‘minfi’ package, and  
182 annotated with the most recent version of the EPIC manifest, the Infinium MethylationEPIC v1.0  
183 B4 Manifest File, (available from <https://support.illumina.com/downloads.html>) (Aryee et al.,  
184 2014; Fortin et al., 2017). We excluded 11 low quality samples from 9 unique participants from  
185 further analyses on the basis of having a median methylated or unmethylated probe intensity  
186 <10.5 (Aryee et al., 2014; Fortin et al., 2017), the remaining samples were background  
187 normalized and dye-bias adjusted with normal exponential out-of-band (“noob”) normalization  
188 (Triche et al., 2013). DNAm data were converted to beta values and biological sex for all  
189 samples was confirmed by clustering samples on all DNAm probes mapping to the X and Y  
190 chromosomes. Beta values were calibrated to Horvath’s 21,368-probe training dataset, and



191 epigenetic age was calculated using R code modified for compatibility with the EPIC array using  
192 the 334/353 epigenetic clock probes present on the array from <https://horvath.genetics.ucla.edu/>  
193 (Horvath, 2013; Teschendorff et al., 2013). The missing DNAm values at these CpG sites can  
194 also be imputed based on the k-nearest neighbors method. We observed a very high correlation  
195 between epigenetic age values calculated with the missing probes removed versus imputed with  
196 k=10 ( $R=0.99$ ,  $p<2.2e-16$ ), in agreement with previous reports; we therefore chose to remove  
197 missing probes (Fiorito et al., 2017; McEwen et al., 2018).

198         Prior to statistical analyses we removed all technical replicates. Epigenetic age  
199 acceleration was calculated as the residual of epigenetic age regressed on chronological age and  
200 technical/batch covariates, including the laboratory collection site at which blood samples were  
201 drawn, and EPIC microarray chip and row. Intrinsic epigenetic age acceleration, a measure  
202 designed to be independent of age-related changes in whole blood cell-type proportions, was  
203 calculated as described in Chen et al. (Chen et al., 2016) as the residual of epigenetic age  
204 regressed on chronological age, technical covariates of collection site, row, and chip, and the  
205 proportions of six blood cell types (CD8T, CD4T, NK, B cells, monocytes, and granulocytes)  
206 estimated from noob-normalized methylation data with the Houseman algorithm (Houseman et  
207 al., 2012). For participants who contributed more than one blood DNAm sample within the 2-  
208 year collection period, we determined that longitudinal data collected within the median 3.6-year  
209 error of the epigenetic clock could not be meaningfully evaluated, and therefore calculated mean  
210 epigenetic age acceleration measures per participant from all available time points and performed  
211 all statistical analyses on these mean values.

212         Statistical analyses of epigenetic age acceleration were conducted using data from the  
213 remaining 640 participants (see Table 2B). To determine if epigenetic age acceleration or

214 intrinsic epigenetic age acceleration differed by sex, dementia diagnosis, or APOE genotype, we  
215 used unbalanced two-way ANOVA designs. With CSF biomarker (amyloid beta, tau and p-tau)  
216 data available from the ADNI repository for a smaller subset of participants with matched EPIC  
217 DNAm data, (n=533, see Table 2C) we used linear regression to test whether APOE $\epsilon$ 4  
218 genotype, amyloid beta, tau, p-tau, dementia diagnosis, or sex were significantly associated with  
219 epigenetic age acceleration.

220

## 221 **Results:**

### 222 *Demographic and biomarker information*

223 Table 1 gives a summary of the variables for the overall data set (N=1460). Overall,  
224 females were significantly younger and had fewer years of education than males ( $P < 0.0001$  for  
225 both). There were more white males than white females in our sample and there were more non-  
226 white females compared to non-white males ( $P < 0.05$ ). In terms of APOE genotype, there were  
227 no sex differences in distribution of APOE genotype with 11% females and 12 % of males  
228 possessing two alleles of APOE $\epsilon$ 4. In the overall data set, the proportion of participants in each  
229 of the diagnosis categories was significantly different for females and males ( $P < 0.05$ ). There  
230 were more females with a baseline diagnosis of AD compared to males (23.7% compared to  
231 21.7%, unadjusted  $P = 0.41$ ), although not significantly, and more females were cognitively  
232 normal than males (26.7% compared to 20.8%, unadjusted  $P = 0.01$ ). However, there were more  
233 males with a diagnosis of late MCI (39.5% versus 32.5%, unadjusted  $P = 0.007$ ) and early MCI  
234 (18.0% versus 17.1%, unadjusted  $P = 0.74$ ) compared to females, although not significantly.

235 Because not all data were available for each subject we created a summary table for the  
236 participants: with CSF biomarkers (Table 2A; N=279), with whole blood EPIC DNAm data

237 (Table 2B; N=640) and with matched EPIC data and measured CSF biomarkers (Table 2C;  
238 N=533). Among those with measured CSF biomarkers, demographics were very similar as per  
239 results from overall data set in Table 1 (see legend of Table 2). For the data applicable to the  
240 participants with available EPIC DNAm data (Table 2B) and participants with EPIC DNAm  
241 data and CSF biomarkers (Table 2C), most of the demographics were similar to the entire data  
242 set except the proportion of participants in each of the diagnosis categories was not significantly  
243 different between females and males.

244 In the overall data set, females had a smaller uncorrected hippocampal volume but larger  
245 corrected hippocampal volume, greater CSF amyloid beta, tau and p-tau, and higher memory  
246 function z-scores than males (Table 1). Biomarkers in the CSF were measured in a subset of  
247 participants (Table 2A). In this smaller cohort, females and males had similar levels of CSF  
248 CRP, CD 40 antigen and IL-6 receptor. However, females had lower CSF cortisol, interleukin-3,  
249 interleukin 8, interleukin-16, immunoglobulin A, and intercellular adhesion molecule compared  
250 to males (Table 2A).

251

252 *Sex and APOE genotype are associated with changes in memory, hippocampus volume, AD and*  
253 *CSF inflammatory markers*

254 Our first aim was to investigate whether sex and APOE genotype interact to influence  
255 cognitive ability, volume of the hippocampus, and biomarkers of AD and inflammation. There  
256 were significant interactions between sex and APOE $\epsilon$ 4 genotype for CSF tau, p-tau, and IL-16  
257 (Table 3). Tau and p-tau levels were significantly higher in females with one or two alleles of  
258 APOE $\epsilon$ 4 compared to males (Fig 1 A and B). Although CSF p-tau and tau levels also increase in  
259 males with APOE $\epsilon$ 4 genotype, they do not rise to the same extent as in females. IL-16 levels

260 were significantly lower in females with no APOE $\epsilon$ 4 alleles compared to males, whereas levels  
261 were similar between the sexes with one or two APOE $\epsilon$ 4 alleles (Fig 1 C and D).

262 Both sex and APOE genotype were independently (main effects of sex or APOE  
263 genotype) associated with memory z-scores and corrected hippocampal volume (Table 3).  
264 Females had higher memory z-scores and larger corrected hippocampal volume across all APOE  
265 genotypes (Fig 1 E and F). Lower memory z-scores were associated with increasing number of  
266 APOE $\epsilon$ 4 alleles in both sexes. Similarly, corrected hippocampus volume was significantly lower  
267 with increasing number of APOE $\epsilon$ 4 alleles in both sexes. Increasing APOE $\epsilon$ 4 alleles was also  
268 associated with lower executive function z-scores, lower amyloid beta, and lower C-reactive  
269 protein (Table 3; Fig 1 G-I), however there was no additional association of these variables with  
270 sex. Finally, results were similar for biomarkers in plasma (Supplementary Table S3).

271

272 *Sex and diagnosis are associated with changes in memory, hippocampus volume, AD and CSF*  
273 *inflammatory markers*

274 We next tested whether sex and dementia status (CN, MCI, and AD) influenced cognitive  
275 ability, corrected hippocampal volume, and CSF biomarkers of AD and inflammation. There  
276 were no significant interactions between sex and diagnosis for any of the tested variables  
277 (memory, executive function, corrected hippocampal volume, CSF tau, p-tau, amyloid beta, and  
278 CSF and plasma inflammatory markers). However, overall both sex and diagnosis were  
279 independently associated with memory z-scores, corrected hippocampal volume and CSF tau and  
280 p-tau (Table 4). Females had higher memory scores, larger corrected hippocampus volume, and  
281 higher tau and p-tau compared to males, irrespective of diagnosis. As expected, increasing

282 severity of diagnosis was associated with lower memory and executive function scores, smaller  
283 corrected hippocampus volume, and higher CSF tau and p-tau irrespective of sex (Fig 2 A-D).

284 We found that although females had higher CSF levels of interleukin 16 (IL-16), and  
285 lower levels of interleukin 8 (IL-8), immunoglobulin A (IgA), and intercellular adhesion  
286 molecule 1 (ICAM1), controlling for age, compared to males, there was no association between  
287 these variables and diagnosis (Fig 2 E-H). Finally, there were associations between diagnosis and  
288 executive function z-scores, and amyloid beta, controlling for age, but not between these  
289 variables and sex (Fig 2 I and J).

290 The results for biomarkers and inflammatory markers in plasma were similar  
291 (Supplementary Table S4), with the exception of a significant relationship between plasma C-  
292 reactive protein (CRP) and sex (adjusted  $p=0.03$ ), and also between plasma cortisol and baseline  
293 diagnosis (adjusted  $P=0.01$ ; Fig 2 K and L). Males have lower levels of CRP compared to  
294 females and we observed a trend between diagnosis and CRP levels in plasma with lower CRP  
295 levels in late MCI and AD (adjusted  $P=0.08$ ). Plasma cortisol was lower in late MCI compared  
296 to CN but higher in AD compared to CN. In summary, although we detected associations  
297 between sex and diagnosis and various parameters, we did not find evidence for a clear sex and  
298 diagnosis interaction.

299

### 300 *Epigenetic age, sex, dementia diagnosis, and AD biomarkers*

301 We investigated the hypothesis that sex and dementia diagnosis affect epigenetic age  
302 acceleration in blood samples of ADNI participants (see Table 5).

303 Epigenetic age acceleration was not associated with sex, dementia diagnosis (CN, EMCI,  
304 LMCI, and AD), or the interaction of sex and diagnosis after multiple test correction (Figure 3).

305 Intrinsic epigenetic age acceleration was also not significantly associated with participant sex,  
306 diagnosis, or their interaction term.

307 To assess the effect of sex and more broadly defined dementia-associated cognitive  
308 impairment on epigenetic age acceleration, we compared epigenetic age acceleration between  
309 participants with any form of clinically ascertained cognitive impairment (AD + LMCI + EMCI,  
310 n=423, proportion female 41%) and those without (CN, n=217, proportion female 50%). By two-  
311 way unbalanced ANOVA neither sex, dementia status, nor their interaction were significantly  
312 associated with epigenetic age acceleration after correction for multiple comparisons.

313 Matched biochemical data including APOE $\epsilon$ 4 genotype and CSF concentrations of  
314 amyloid beta, tau, and phosphorylated tau was available for a subset of participants with EPIC  
315 DNAm data (n=533). Based on the hypothesis that epigenetic age acceleration may be more  
316 strongly associated with concentrations of pathologically relevant compounds than with  
317 diagnosis, we assessed the impact of sex, APOE $\epsilon$ 4 genotype, amyloid beta concentration, tau and  
318 p-tau concentration on epigenetic age acceleration and intrinsic epigenetic age acceleration with  
319 linear regression. None of these variables was significantly associated with epigenetic age  
320 acceleration (Table 6, results for intrinsic epigenetic age acceleration not shown).

321 In addition to dementia diagnosis for all participants, we also had access to two  
322 composite scores designed by ADNI collaborators to reflect executive function and memory;  
323 these scores have been demonstrated to be independently predictive of the transition from mild  
324 cognitive impairment to a formal diagnosis of Alzheimer's disease (Gibbons et al. 2012, Gale et  
325 al. 2013). By a two-way unbalanced ANOVA models investigating the effect of sex and memory  
326 score on epigenetic age acceleration, neither sex (p=0.248), memory score (p=0.486), nor their  
327 interaction (p=0.227) were associated with epigenetic age acceleration. In a similar model,

328 neither sex ( $p=0.260$ ), executive function ( $p=0.105$ ), or the interaction term of sex and executive  
329 function ( $p=0.153$ ) were associated with epigenetic age acceleration.

330

### 331 **Discussion**

332 In the present study, we found that tau related pathology in the CSF was  
333 disproportionately elevated by APOE $\epsilon$ 4 genotype in females compared to males. However,  
334 diagnosis and APOE genotype were independently associated with reduced memory scores,  
335 hippocampal volume (corrected by intracranial volume) and reduced CSF amyloid beta which  
336 was similar in males and females. Furthermore, there were main effects of sex as females had  
337 lower CSF cytokines (IL-8, IL-16, IL-18) and CSF and plasma immunoglobulins (IgA, IgE,  
338 respectively) but higher plasma CRP and tau related pathology compared to males, regardless of  
339 diagnosis and APOE genotype. Interestingly, females had larger corrected hippocampal volume  
340 and better memory scores which may contribute to their delayed diagnosis (Sundermann et al.,  
341 2017). Finally, we found no differences in epigenetic age acceleration by dementia diagnosis or  
342 sex in this cohort of samples with available whole blood EPIC DNAm data. In this ADNI  
343 cohort, slightly more females presented with a diagnosis of AD compared to males, whereas  
344 significantly more males presented with a diagnosis of MCI supporting the prevalence observed  
345 in bigger populations (Winblad et al., 2016; Mielke et al., 2014). Previous work has  
346 demonstrated sex differences in rates of AD and symptoms of AD (reviewed in Ferretti et al.,  
347 2018; Mielke et al., 2014; Nebel et al., 2018), and the current study also suggests that biomarkers  
348 of AD may be different between males and females between genotypes, and this should be  
349 considered in future studies and researchers should be cautioned to use sex as a biological  
350 variable in all analyses.

351

352 *Females show greater tau neuropathology disproportionately affected by APOE genotype*

353         In the present study, we found that females have significantly higher baseline tau and p-  
354 tau levels in CSF than males and these are indicative of the formation of neurofibrillary tangles  
355 and AD pathology (Blennow et al., 2015; Henriques et al., 2018). This is in agreement with a  
356 recent ADNI study (Sundermann et al., 2018; but see an earlier ADNI study Holland et al.,  
357 2013) and with animal models (Lewis et al., 2001). Intriguingly, we also found that levels of tau  
358 and p-tau were disproportionately elevated with APOE $\epsilon$ 4 allele expression in females compared  
359 to males. Previous studies indicate that females with the APOE $\epsilon$ 4 allele are at a greater risk for  
360 developing AD than are males with this allele (Altmann et al., 2014), and sex differences in tau  
361 and p-tau may be one underlying mechanism by which this occurs. In females (65-75 years of  
362 age) one allele of  $\epsilon$ 4 increases the risk of AD by 4-fold relative to males, indicating that genotype  
363 may affect females differently (Neu et al., 2017). Levels of CSF tau are hypothesized to increase  
364 after CSF amyloid beta declines and amyloid beta aggregates and deposits in the brain (Blennow  
365 et al., 2015). However, in this study although we found sex differences in CSF tau and p-tau  
366 levels, no significant differences were seen in CSF amyloid beta after controlling for age (see  
367 below) indicating that the pathway may be different in females compared to males or that the  
368 timeline of tau and amyloid beta deposition may not be consistent.

369         In this ADNI cohort, more females presented with a diagnosis of AD compared to males.  
370 Although the ADNI cohort is relatively small, this result supports the prevalence observed in  
371 bigger populations (Winblad et al., 2016). Together with the disproportionate effect of APOE  
372 genotype on tau-related pathology it supports the idea that females have a higher burden of the  
373 disease. On the other hand, more males presented with a diagnosis of MCI and this is in line with



374 the research that males are more likely to be diagnosed with MCI compared to females (Mielke  
375 et al., 2014). Females progress faster from MCI to AD (Lin et al., 2015) and sex differences in  
376 tau related pathology found in the current study may be the underlying mechanism for this  
377 accelerated transition.

378

379 *Sex differences in hippocampal volume depend on correction for intracranial volume. Females*  
380 *have better memory scores than males that may have been driven by verbal memory*

381 In the present study, we found that increasing APOE $\epsilon$ 4 alleles and AD diagnosis was  
382 associated with reduced corrected hippocampal volume, memory and executive function scores  
383 consistent with past literature (Apostolova et al., 2006; Buckner, 2004; Ewers et al., 2012; Jack  
384 et al., 2000; Li et al., 2016; Mungas et al., 2010; Petersen et al., 2000; Pievani et al., 2011; Shi et  
385 al., 2014). Surprisingly, although females have higher levels of tau and p-tau, they presented  
386 with larger corrected hippocampal volume and better memory and executive function scores than  
387 males, regardless of diagnosis and APOE genotype. Previous studies have suggested that there  
388 are sex differences in hippocampal volume, favoring males, but the sex differences depend on  
389 whether hippocampal volume is corrected for by intracranial volume (Tan et al., 2016), a finding  
390 that is supported by the current study. In a number of studies, including the present study, males  
391 have a larger hippocampus without correcting for intracranial volume (Cavedo et al., 2018; Jack  
392 et al., 2015; Murphy et al., 1996; Ritchie et al., 2018; Sohn et al., 2018; Sundermann et al., 2018;  
393 Tan et al., 2016). However after correcting for intracranial volume, either the sex difference  
394 disappears (Cavedo et al., 2018; Ritchie et al., 2018; Tan et al., 2016) or females have larger  
395 corrected hippocampal volume (this study; Jack et al., 2015; Murphy et al., 1996; Sohn et al.,  
396 2018; Sundermann et al., 2018). Regardless of hippocampal volume, volume loss is greater in

397 aging females (Ardekani et al., 2016; Koran et al., 2017; Murphy et al., 1996) and in females  
398 with one or two APOE $\epsilon$ 4 alleles (Fleisher et al., 2005). Although in the present study we did not  
399 examine longitudinal data, we found that increasing APOE $\epsilon$ 4 alleles reduced corrected  
400 hippocampal volume similarly in males and females. In contrast, when CN, MCI and AD  
401 individuals were analysed separately in the ADNI database, APOE $\epsilon$ 4 was associated with a  
402 smaller corrected hippocampal volume in CN males only, controlling for age and education  
403 (Sundermann et al., 2018). In addition, also using the ADNI database, Koran et al. (2017) found  
404 that females with low CSF amyloid beta had more hippocampal atrophy and faster decline in  
405 memory and executive function than males and this sex difference was more pronounced in  
406 APOE $\epsilon$ 4 carriers. Therefore, sex and APOE genotype can interact to affect corrected  
407 hippocampal volume reduction with age in certain subgroups and across time (e.g., in CN or  
408 individuals with low CSF amyloid beta). Differences in results between studies are likely due to  
409 differences in statistical analyses (e.g., analysing diagnosis groups separately, partitioning the  
410 data based on amyloid beta levels, and differences in covariates included) and/or whether  
411 longitudinal data analyses are included.

412 We found that in addition to larger corrected hippocampal volume, females also had  
413 better composite memory scores (but not executive function scores) than males, regardless of  
414 diagnosis and APOE genotype. Previous studies have found that females have better verbal  
415 memory in cognitively normal individuals (Jack et al., 2015), and in MCI and AD ADNI cohorts  
416 compared to males (Sundermann et al., 2018, 2016). Here we used the ADNI memory score  
417 developed by Crane et al. (2012) to detect abnormal memory including language, attention, and  
418 logical memory so it is possible that verbal memory may be driving the sex difference favouring  
419 females in the present study. In contrast, Buckley et al.(2018) found no sex differences using a

420 composite cognitive score that includes memory and executive function (Preclinical Alzheimer's  
421 Cognitive Composite score with semantic processing, PACC5) using ADNI and two other  
422 cohorts. In this study using the current ADNI cohort, males were slightly more educated than  
423 females, and although we did not use education as a covariate, one would expect education levels  
424 would have positive effects on memory, suggesting that education is not a factor for the observed  
425 sex difference in memory. Altogether, we found that in females tau pathology was increased but  
426 memory scores, which included verbal memory, were higher and corrected hippocampal volume  
427 were larger compared to males suggesting females have a reserve against brain damage that  
428 delays either the onset of cognitive decline (Stern, 2002) or diagnosis (Sundermann et al., 2017).  
429 However, once cognitive decline begins, females show higher rates of declines compared to  
430 males (this was observed by Buckley et al., 2018; Holland et al., 2013; Hua et al., 2010 using the  
431 ADNI database) perhaps because the underlying pathology is elevated in females.

432

#### 433 *AD affects amyloid beta similarly in both sexes*

434 We found that AD diagnosis was associated with lower CSF amyloid beta, as expected,  
435 and this was irrespective of sex, which indicates greater amyloid deposition with AD (Henriques  
436 et al., 2018). These findings are consistent with data from studies in AD patients (Buckley et al.,  
437 2018) and in cognitively normal individuals (Jack et al., 2015). Other studies have found using  
438 PET that males have higher amyloid beta levels or lower amyloid beta burden compared to  
439 females dependent on APOE genotype (Sundermann et al., 2018) or in cognitively normal adults  
440 in the anterior cingulate (Cavedo et al., 2018). In this study, we used CSF amyloid beta data  
441 which detects abnormal amyloid deposition earlier than amyloid beta by PET (reviewed in  
442 Blennow et al., 2015). Thus, taken together, sex differences in amyloid beta may be detected in

443 specific brain regions and later in the disease, although more research is needed investigating sex  
444 differences in AD biomarkers.

445

446 *Females have higher CRP levels but lower cytokine and immunoglobulin levels compared to*  
447 *males*

448 In this study, we investigated whether sex interacted with APOE genotype or dementia  
449 diagnosis to influence inflammatory, neurotrophic and neuroplasticity markers. We found that  
450 plasma CRP, a widely used inflammatory and cardiovascular marker (Koenig et al., 1999; Ridker  
451 et al., 1998), was affected by sex and APOE genotype. Females, regardless of diagnosis or  
452 APOE genotype, had significantly higher plasma CRP relative to males, consistent with findings  
453 in healthy individuals (Khera et al., 2005). Higher levels of peripheral CRP may suggest higher  
454 inflammation in females, which is associated with an increased risk in all-cause dementia  
455 (Koyama et al., 2013). In contrast, APOE $\epsilon$ 4 genotype decreased circulating CRP levels,  
456 consistent with previous research in large population studies (Hubacek et al., 2010; Yun et al.,  
457 2015). Recent meta-analyses, without regard to sex, did not find differences in peripheral levels  
458 of CRP in AD compared to control patients (Gong et al., 2016; Ng et al., 2018). However, in  
459 patients with mild and moderate dementia only, CRP levels were lower compared to the healthy  
460 control group (Gong et al., 2016). To our knowledge, no other study has examined sex  
461 differences in CRP in relation to AD.

462 We also found that CSF IL-16 was affected by sex and APOE genotype. CSF IL-16  
463 levels were lower in females with no APOE $\epsilon$ 4 alleles compared to males, but with increasing  
464 number of  $\epsilon$ 4 alleles, no sex differences were detected. IL-16 has been implicated in AD (Rosa et  
465 al., 2006) and IL-16 levels decrease with disease severity (analysis without regard to sex; Motta

466 et al., 2007). In this ADNI cohort, IL-16 levels were not affected by diagnosis but our results  
467 suggest that APOE genotype can modulate levels in a sex-dependent way. We also found  
468 biomarkers that were affected by sex but not diagnosis or APOE genotype for example, females  
469 had lower CSF levels of ICAM1 compared to males, but there was no influence of APOE  
470 genotype or diagnosis. Consistent with our findings, ICAM1 serum levels were lower in healthy  
471 females compared to males (Ponthieux et al., 2003). ICAM1 is a type of adhesion molecule  
472 associated with microvascular endothelial activation (Zenaro et al., 2017) and plasma ICAM1  
473 levels (but not CSF levels; Nielsen et al 2007) were higher in patients with AD (Huang et al  
474 2015; Nielsen et al 2007; Rentzos et al 2004). However, it is intriguing that females have lower  
475 CSF levels of cytokines (IL-8, IL-16, IL-18), and immunoglobulins (IgE and IgA) but higher tau  
476 pathology compared to males. Neuroinflammation is associated with AD but it can have both  
477 beneficial and detrimental roles (Walters et al., 2016). Increased expression of pro-inflammatory  
478 cytokines contributes to neuronal loss, while anti-inflammatory effects contribute to amyloid  
479 beta clearance (Heneka et al., 2015). In AD mouse models, some pro-inflammatory mechanisms  
480 reduced plaque pathology, while anti-inflammatory cytokines increased amyloid beta deposition  
481 (Chakrabarty et al., 2012, 2011, 2010a, 2010b; Ghosh et al., 2013; Shaftel et al., 2007). It has  
482 been suggested that there are beneficial pro-inflammatory mechanisms and detrimental anti-  
483 inflammatory mechanisms in AD (Heneka et al., 2015). It is possible that males and females  
484 have varying levels of beneficial vs detrimental immune responses which can affect how the  
485 disease progresses in each of the sexes but it is also important to remember that CSF levels may  
486 not match levels in different regions of the brain.

487

488 *Sex, AD and biochemical markers do not affect blood epigenetic age acceleration*

489 We did not observe an association between either sex or diagnosis and epigenetic age  
490 acceleration or intrinsic epigenetic age acceleration. To our knowledge, no other study has  
491 similarly probed epigenetic age acceleration in peripheral tissue in the presence of AD, or  
492 whether epigenetic age acceleration in AD is associated with sex.

493 This study was partially undertaken to investigate whether epigenetic age acceleration  
494 that has been associated with the AD brain is reflected in peripheral tissues. Levine et al. have  
495 previously demonstrated increased epigenetic age acceleration in AD, however Levine's study  
496 was conducted on post-mortem prefrontal cortex tissue, and did not explicitly investigate the role  
497 of sex in epigenetic age acceleration (Levine et al., 2015). While brain-blood methylation  
498 profiles are reasonably correlated ( $r=0.86$ ) (Braun et al., 2019), DNA methylation profiles of  
499 peripheral tissues are imperfect representatives of the brain, and do not recapitulate all epigenetic  
500 alterations with high fidelity. Thus, our findings do not contradict the finding of increased  
501 epigenetic age acceleration in the presence of AD in the prefrontal cortex, but suggest that  
502 accelerated epigenetic aging in AD is not a pan-tissue phenomenon. Our finding of a lack of  
503 significant association between AD, biological sex, and epigenetic age acceleration in whole  
504 blood DNA methylation profiles could suggest a tissue-specific dysregulation of an epigenetic  
505 maintenance system, in which the brain epigenome is most strongly affected by AD (Levine et  
506 al., 2015). The phenotype of patients affected by AD and global gene expression patterns of the  
507 APOE protein, with high expression in brain, and low expression in whole blood (GTEx Project,  
508 2018) further support this hypothesis.

509 Intriguingly, epigenetic age was observed to be lower on average than chronological age  
510 (see Table 5). Horvath's epigenetic clock was trained on DNAm data from older versions of the  
511 Illumina DNAm arrays with more limited genomic coverage; 19 of the CpG probes required to

512 calculate epigenetic age via this method do not exist on the EPIC array. Two previous studies  
513 investigated the application of Horvath's epigenetic clock to EPIC data with conflicting results  
514 (Dhingra et al., 2019; McEwen et al., 2018), the largest issue being chronic underestimation of  
515 epigenetic age due to the positive linear regression coefficients associated with the missing  
516 probes(Dhingra et al., 2019). Both imputing and removing the missing probes from the array  
517 resulted in a chronic underprediction of epigenetic age with Horvath's clock, suggesting that this  
518 is likely an artefact of the array platform and probe-set rather than the method chosen to deal  
519 with missing values, although it is possible that an adjustment factor could be devised to more  
520 accurately apply Horvath's clock to EPIC data. In future explorations of epigenetic age with  
521 EPIC DNAm array data this should be considered, as there are other epigenetic age predictors  
522 available that have been trained on EPIC data such as the PhenoAge and GrimAge clocks,  
523 although these tools have limitations as well; for example, both PhenoAge and GrimAge were  
524 trained only on blood DNAm data, as compared to the original pan-tissue epigenetic clock, and  
525 therefore may have limited applicability and relevance in other tissues (Levine et al., 2018; Lu et  
526 al., 2019).

527

## 528 **Limitations**

529 The ADNI cohort is not ethnically or socioeconomically diverse, being mostly composed  
530 of white (only 12 individuals were not-white) and highly educated individuals (average 15.69  
531 years of education). As incidence, prevalence, and age of onset of AD varies by ethnicity  
532 (Hispanics, Fitten et al., 2014; Mayeda et al., 2016; African-Americans, Steenland et al., 2016)  
533 and education (Sharp and Gatz, 2011), our conclusions may not apply to more ethnically and  
534 socially diverse populations. In addition to sex, it is possible the underlying mechanisms of AD

535 are different depending on ethnicity. Finally, the ADNI biomarker data set has a low sample size  
536 (279 total), especially when taking into account diagnosis, sex and APOE genotype. Small  
537 sample size is also a limitation of the epigenetic analyses presented. Even in the larger 640-  
538 participant cohort, only 37 participants (5.78%) had an AD diagnosis, so statistical analyses were  
539 underpowered to detect subtle differences by diagnosis group. Additionally other pathologies in  
540 these participants, such as cancer, cardiovascular disease, smoking status, or obesity may have  
541 influenced AD neuropathology, biomarkers and epigenomes and limited our interpretations.

542

### 543 **Conclusion**

544 As expected, more females presented with a diagnosis of AD whereas more males  
545 presented with MCI diagnosis compared to the opposite sex. AD biomarkers (CSF tau and p-tau  
546 but not amyloid beta) were disproportionately affected by APOE genotype in females compared  
547 to males supporting the idea that females share a higher burden of the disease. Interestingly,  
548 although females in this cohort had elevated AD biomarkers, they also had larger corrected  
549 hippocampal volume and higher memory function scores compared to males, regardless of  
550 APOE genotype and dementia diagnosis. Therefore, it is possible that females may have a  
551 reserve that protects the brain from damage to delay cognitive decline or delay diagnosis.  
552 Finally, we found that females had lower cytokine and immunoglobulin levels but higher CRP  
553 levels compared to males. Together our work suggests that that the underlying physiology of  
554 aging and AD may be sex-specific.

555

### 556 **Acknowledgments**



557 Data collection and sharing for this project was funded by the Alzheimer's Disease  
558 Neuroimaging Initiative (ADNI) (National Institutes of Health Grant U01 AG024904) and DOD  
559 ADNI (Department of Defense award number W81XWH-12-2-0012). ADNI is funded by the  
560 National Institute on Aging, the National Institute of Biomedical Imaging and Bioengineering,  
561 and through generous contributions from the following: AbbVie, Alzheimer's Association;  
562 Alzheimer's Drug Discovery Foundation; Araclon Biotech; BioClinica, Inc.; Biogen; Bristol-  
563 Myers Squibb Company; CereSpir, Inc.; Cogstate; Eisai Inc.; Elan Pharmaceuticals, Inc.; Eli  
564 Lilly and Company; EuroImmun; F. Hoffmann-La Roche Ltd and its affiliated company  
565 Genentech, Inc.; Fujirebio; GE Healthcare; IXICO Ltd.; Janssen Alzheimer Immunotherapy  
566 Research & Development, LLC.; Johnson & Johnson Pharmaceutical Research & Development  
567 LLC.; Lumosity; Lundbeck; Merck & Co., Inc.; Meso Scale Diagnostics, LLC.; NeuroRx  
568 Research; Neurotrack Technologies; Novartis Pharmaceuticals Corporation; Pfizer Inc.; Piramal  
569 Imaging; Servier; Takeda Pharmaceutical Company; and Transition Therapeutics. The Canadian  
570 Institutes of Health Research is providing funds to support ADNI clinical sites in Canada. Private  
571 sector contributions are facilitated by the Foundation for the National Institutes of Health  
572 ([www.fnih.org](http://www.fnih.org)). The grantee organization is the Northern California Institute for Research and  
573 Education, and the study is coordinated by the Alzheimer's Therapeutic Research Institute at the  
574 University of Southern California. ADNI data are disseminated by the Laboratory for Neuro  
575 Imaging at the University of Southern California. Funding for this study was provided by a  
576 Canadian Institutes of Health Research (CHIR) grant to LAMG (PJT-148662) and a CIHR sex  
577 catalyst grant to WPR (Reference No. 158613). WPR receives salary support through an  
578 investigatorship award from the BC Children's Hospital Research Institute. PDG is funded by  
579 the Alzheimer's Association of the USA and Brain Canada with the financial support of Health

580 Canada through the Brain Canada Research Fund (AARF-17-529705). The views expressed  
581 herein do not necessarily represent the views of the Minister of Health or the Government of  
582 Canada. AMI is funded by a University of British Columbia Four Year Doctoral Fellowship and  
583 the CIHR Frederick Banting and Charles Best Masters Research Award.

584

### 585 **Figure captions**

586 **Figure 1.** A. CSF tau (pg/ml), B. CSF p-tau (pg/ml), C. CSF IL-16 (pg/ml), D. ADNI memory z-  
587 scores, E. corrected hippocampal volume (hippocampal volume/intracranial volume), F. ADNI  
588 executive function z-scores, G. CSF amyloid beta (pg/ml), and H. CSF C-reactive protein (CRP;  
589  $\mu\text{g/ml}$ ) in ADNI participants by sex and number of APOE $\epsilon$ 4 alleles (0, 1, 2 alleles).

590

591 **Figure 2.** A. ADNI memory z-scores, B. corrected hippocampal volume (hippocampal volume/  
592 intracranial volume), C. CSF tau (pg/ml), D. CSF p-tau (pg/ml), E. CSF IL-16 (pg/ml), F. CSF  
593 IL-8 (pg/ml), G. CSF IgA (mg/ml), H. CSF Intercellular adhesion molecule (ICAM1; ng/ml), I.  
594 ADNI executive function z-scores, J. CSF amyloid beta (pg/ml), K. plasma C-reactive protein  
595 (CRP;  $\mu\text{g/ml}$ ), and L. plasma cortisol (ng/ml) in ADNI participants by sex and diagnosis (CN,  
596 EMCI, LMCI, AD). CN, cognitively normal; EMCI, early mild cognitive impairment; LMCI,  
597 late mild cognitive impairment; AD, Alzheimer's disease.

598

599 **Figure 3.** Universal epigenetic age acceleration does not differ statistically significantly by  
600 participant sex or diagnosis (CN, EMCI, LMCI, AD) in this ADNI cohort. CN, cognitively  
601 normal; EMCI, early mild cognitive impairment; LMCI, late mild cognitive impairment; AD,  
602 Alzheimer's disease.

## 603 References

- 604 Altmann, A., Tian, L., Henderson, V.W., Greicius, M.D., 2014. Sex modifies the APOE-related risk of  
605 developing Alzheimer disease. *Annals of Neurology* 75, 563–573.  
606 <https://doi.org/10.1002/ana.24135>
- 607 Alzheimer's Association, 2017. 2017 Alzheimer's disease facts and figures. *Alzheimer's & Dementia* 13,  
608 325–373. <https://doi.org/10.1016/j.jalz.2017.02.001>
- 609 Apostolova, L.G., Dutton, R.A., Dinov, I.D., Hayashi, K.M., Toga, A.W., Cummings, J.L., Thompson,  
610 P.M., 2006. Conversion of mild cognitive impairment to Alzheimer disease predicted by  
611 hippocampal atrophy maps. *Arch. Neurol.* 63, 693–699.  
612 <https://doi.org/10.1001/archneur.63.5.693>
- 613 Ardekani, B.A., Convit, A., Bachman, A.H., 2016. Analysis of the MIRIAD Data Shows Sex Differences  
614 in Hippocampal Atrophy Progression. *J. Alzheimers Dis.* 50, 847–857.  
615 <https://doi.org/10.3233/JAD-150780>
- 616 Aryee, M.J., Jaffe, A.E., Corrada-Bravo, H., Ladd-Acosta, C., Feinberg, A.P., Hansen, K.D., Irizarry,  
617 R.A., 2014. Minfi: a flexible and comprehensive Bioconductor package for the analysis of  
618 Infinium DNA methylation microarrays. *Bioinformatics* 30, 1363–1369.  
619 <https://doi.org/10.1093/bioinformatics/btu049>
- 620 Barnes, L.L., Wilson, R.S., Bienias, J.L., Schneider, J.A., Evans, D.A., Bennett, D.A., 2005. Sex  
621 differences in the clinical manifestations of Alzheimer disease pathology. *Arch. Gen. Psychiatry*  
622 62, 685–691. <https://doi.org/10.1001/archpsyc.62.6.685>
- 623 Baumgart, M., Snyder, H.M., Carrillo, M.C., Fazio, S., Kim, H., Johns, H., 2015. Summary of the  
624 evidence on modifiable risk factors for cognitive decline and dementia: A population-based  
625 perspective. *Alzheimers Dement* 11, 718–726. <https://doi.org/10.1016/j.jalz.2015.05.016>
- 626 Benjamini, Y., Hochberg, Y., 1995. Controlling the False Discovery Rate: A Practical and Powerful  
627 Approach to Multiple Testing. *Journal of the Royal Statistical Society. Series B (Methodological)*  
628 57, 289–300.
- 629 Blennow, K., Dubois, B., Fagan, A.M., Lewczuk, P., de Leon, M.J., Hampel, H., 2015. Clinical utility of  
630 cerebrospinal fluid biomarkers in the diagnosis of early Alzheimer's disease. *Alzheimer's &*  
631 *Dementia* 11, 58–69. <https://doi.org/10.1016/j.jalz.2014.02.004>
- 632 Braun, P.R., Han, S., Hing, B., Nagahama, Y., Gaul, L.N., Heinzman, J.T., Grossbach, A.J., Close, L.,  
633 Dlouhy, B.J., Howard, M.A., Kawasaki, H., Potash, J.B., Shinozaki, G., 2019. Genome-wide  
634 DNA methylation comparison between live human brain and peripheral tissues within  
635 individuals. *Translational Psychiatry* 9, 47. <https://doi.org/10.1038/s41398-019-0376-y>
- 636 Buckley, R.F., Mormino, E.C., Amariglio, R.E., Properzi, M.J., Rabin, J.S., Lim, Y.Y., Papp, K.V.,  
637 Jacobs, H.I.L., Burnham, S., Hanseeuw, B.J., Doré, V., Dobson, A., Masters, C.L., Waller, M.,  
638 Rowe, C.C., Maruff, P., Donohue, M.C., Rentz, D.M., Kirn, D., Hedden, T., Chhatwal, J.,  
639 Schultz, A.P., Johnson, K.A., Villemagne, V.L., Sperling, R.A., 2018. Sex, amyloid, and APOE  
640  $\epsilon 4$  and risk of cognitive decline in preclinical Alzheimer's disease: Findings from three well-  
641 characterized cohorts. *Alzheimer's & Dementia* 14, 1193–1203.  
642 <https://doi.org/10.1016/j.jalz.2018.04.010>
- 643 Buckner, R.L., 2004. Memory and Executive Function in Aging and AD: Multiple Factors that Cause  
644 Decline and Reserve Factors that Compensate. *Neuron* 44, 195–208.  
645 <https://doi.org/10.1016/j.neuron.2004.09.006>
- 646 Caruso, A., Nicoletti, F., Mango, D., Saidi, A., Orlando, R., Scaccianoce, S., 2018. Stress as risk factor  
647 for Alzheimer's disease. *Pharmacological Research* 132, 130–134.  
648 <https://doi.org/10.1016/j.phrs.2018.04.017>
- 649 Cavedo, E., Chiesa, P.A., Houot, M., Ferretti, M.T., Grothe, M.J., Teipel, S.J., Lista, S., Habert, M.-O.,  
650 Potier, M.-C., Dubois, B., Hampel, H., Bakardjian, H., Benali, H., Bertin, H., Bonheur, J.,  
651 Boukadida, L., Boukerrou, N., Cavedo, E., Chiesa, P., Colliot, O., Dubois, B., Dubois, M.,  
652 Epelbaum, S., Gagliardi, G., Genthon, R., Habert, M.-O., Hampel, H., Houot, M., Kas, A.,

- 653 Lamari, F., Levy, M., Lista, S., Metzinger, C., Mochel, F., Nyasse, F., Poisson, C., Potier, M.-C.,  
654 Revillon, M., Santos, A., Andrade, K.S., Sole, M., Surtee, M., de Schotten, M.T., Vergallo, A.,  
655 Younsi, N., Aguilar, L.F., Babiloni, C., Baldacci, F., Benda, N., Black, K.L., Bokde, A.L.W.,  
656 Bonuccelli, U., Broich, K., Bun, R.S., Cacciola, F., Castrillo, J., Cavedo, E., Ceravolo, R., Chiesa,  
657 P.A., Colliot, O., Coman, C.-M., Corvol, J.-C., Cuello, A.C., Cummings, J.L., Depypere, H.,  
658 Dubois, B., Duggento, A., Durrleman, S., Escott-Price, V., Federoff, H., Ferretti, M.T., Fiandaca,  
659 M., Frank, R.A., Garaci, F., Genthon, R., George, N., Giorgi, F.S., Graziani, M., Haberkamp, M.,  
660 Habert, M.-O., Hampel, H., Herholz, K., Karran, E., Kim, S.H., Koronyo, Y., Koronyo-Hamaoui,  
661 M., Lamari, F., Langevin, T., Lehericy, S., Lista, S., Lorceau, J., Mapstone, M., Neri, C.,  
662 Nisticò, R., Nyasse-Messene, F., O'bryant, S.E., Perry, G., Ritchie, C., Rojkova, K., Rossi, S.,  
663 Saidi, A., Santarnecchi, E., Schneider, L.S., Sporns, O., Toschi, N., Verdooner, S.R., Vergallo,  
664 A., Villain, N., Welikovitsh, L.A., Woodcock, J., Younesi, E., 2018. Sex differences in functional  
665 and molecular neuroimaging biomarkers of Alzheimer's disease in cognitively normal older  
666 adults with subjective memory complaints. *Alzheimer's & Dementia* 14, 1204–1215.  
667 <https://doi.org/10.1016/j.jalz.2018.05.014>
- 668 Chakrabarty, P., Ceballos-Diaz, C., Beccard, A., Janus, C., Dickson, D., Golde, T.E., Das, P., 2010a. IFN-  
669 gamma promotes complement expression and attenuates amyloid plaque deposition in amyloid  
670 beta precursor protein transgenic mice. *J. Immunol.* 184, 5333–5343.  
671 <https://doi.org/10.4049/jimmunol.0903382>
- 672 Chakrabarty, P., Herring, A., Ceballos-Diaz, C., Das, P., Golde, T.E., 2011. Hippocampal expression of  
673 murine TNF $\alpha$  results in attenuation of amyloid deposition in vivo. *Molecular Neurodegeneration*  
674 6, 16. <https://doi.org/10.1186/1750-1326-6-16>
- 675 Chakrabarty, P., Jansen-West, K., Beccard, A., Ceballos-Diaz, C., Levites, Y., Verbeeck, C., Zubair,  
676 A.C., Dickson, D., Golde, T.E., Das, P., 2010b. Massive gliosis induced by interleukin-6  
677 suppresses A $\beta$  deposition in vivo: evidence against inflammation as a driving force for amyloid  
678 deposition. *FASEB J* 24, 548–559. <https://doi.org/10.1096/fj.09-141754>
- 679 Chakrabarty, P., Tianbai, L., Herring, A., Ceballos-Diaz, C., Das, P., Golde, T.E., 2012. Hippocampal  
680 expression of murine IL-4 results in exacerbation of amyloid deposition. *Mol Neurodegener* 7,  
681 36. <https://doi.org/10.1186/1750-1326-7-36>
- 682 Chen, B.H., Marioni, R.E., Colicino, E., Peters, M.J., Ward-Caviness, C.K., Tsai, P.-C., Roetker, N.S.,  
683 Just, A.C., Demerath, E.W., Guan, W., Bressler, J., Fornage, M., Studenski, S., Vandiver, A.R.,  
684 Moore, A.Z., Tanaka, T., Kiel, D.P., Liang, L., Vokonas, P., Schwartz, J., Lunetta, K.L.,  
685 Murabito, J.M., Bandinelli, S., Hernandez, D.G., Melzer, D., Nalls, M., Pilling, L.C., Price, T.R.,  
686 Singleton, A.B., Gieger, C., Holle, R., Kretschmer, A., Kronenberg, F., Kunze, S., Linseisen, J.,  
687 Meisinger, C., Rathmann, W., Waldenberger, M., Visscher, P.M., Shah, S., Wray, N.R., McRae,  
688 A.F., Franco, O.H., Hofman, A., Uitterlinden, A.G., Absher, D., Assimes, T., Levine, M.E., Lu,  
689 A.T., Tsao, P.S., Hou, L., Manson, J.E., Carty, C.L., LaCroix, A.Z., Reiner, A.P., Spector, T.D.,  
690 Feinberg, A.P., Levy, D., Baccarelli, A., van Meurs, J., Bell, J.T., Peters, A., Deary, I.J., Pankow,  
691 J.S., Ferrucci, L., Horvath, S., 2016. DNA methylation-based measures of biological age: meta-  
692 analysis predicting time to death. *Aging (Albany NY)* 8, 1844–1859.  
693 <https://doi.org/10.18632/aging.101020>
- 694 Corder, E.H., Saunders, A.M., Strittmatter, W.J., Schmechel, D.E., Gaskell, P.C., Small, G.W., Roses,  
695 A.D., Haines, J.L., Pericak-Vance, M.A., 1993. Gene dose of apolipoprotein E type 4 allele and  
696 the risk of Alzheimer's disease in late onset families. *Science* 261, 921–923.  
697 <https://doi.org/10.1126/science.8346443>
- 698 Crane, P.K., Carle, A., Gibbons, L.E., Insel, P., Mackin, R.S., Gross, A., Jones, R.N., Mukherjee, S.,  
699 Curtis, S.M., Harvey, D., Weiner, M., Mungas, D., Alzheimer's Disease Neuroimaging Initiative,  
700 2012. Development and assessment of a composite score for memory in the Alzheimer's Disease  
701 Neuroimaging Initiative (ADNI). *Brain Imaging Behav* 6, 502–516.  
702 <https://doi.org/10.1007/s11682-012-9186-z>

- 703 Dantzer, R., 2018. Neuroimmune Interactions: From the Brain to the Immune System and Vice Versa.  
704 *Physiol. Rev.* 98, 477–504. <https://doi.org/10.1152/physrev.00039.2016>
- 705 de Miranda, A.S., Zhang, C.-J., Katsumoto, A., Teixeira, A.L., 2017. Hippocampal adult neurogenesis:  
706 Does the immune system matter? *Journal of the Neurological Sciences* 372, 482–495.  
707 <https://doi.org/10.1016/j.jns.2016.10.052>
- 708 Degerman, S., Josefsson, M., Nordin Adolfsson, A., Wennstedt, S., Landfors, M., Haider, Z., Pudas, S.,  
709 Hultdin, M., Nyberg, L., Adolfsson, R., 2017. Maintained memory in aging is associated with  
710 young epigenetic age. *Neurobiology of Aging* 55, 167–171.  
711 <https://doi.org/10.1016/j.neurobiolaging.2017.02.009>
- 712 Dhingra, R., Kwee, L.C., Diaz-Sanchez, D., Devlin, R.B., Cascio, W., Hauser, E.R., Gregory, S., Shah,  
713 S., Kraus, W.E., Olden, K., Ward-Caviness, C.K., 2019. Evaluating DNA methylation age on the  
714 Illumina MethylationEPIC Bead Chip. *PLOS ONE* 14, e0207834.  
715 <https://doi.org/10.1371/journal.pone.0207834>
- 716 Ewers, M., Walsh, C., Trojanowski, J.Q., Shaw, L.M., Petersen, R.C., Jack, C.R., Feldman, H.H., Bokde,  
717 A.L.W., Alexander, G.E., Scheltens, P., Vellas, B., Dubois, B., Weiner, M., Hampel, H., 2012.  
718 Prediction of conversion from mild cognitive impairment to Alzheimer’s disease dementia based  
719 upon biomarkers and neuropsychological test performance. *Neurobiology of Aging* 33, 1203-  
720 1214.e2. <https://doi.org/10.1016/j.neurobiolaging.2010.10.019>
- 721 Ferretti, M.T., Iulita, M.F., Cavedo, E., Chiesa, P.A., Schumacher Dimech, A., Santuccione Chadha, A.,  
722 Baracchi, F., Girouard, H., Misoch, S., Giacobini, E., Depypere, H., Hampel, H., 2018. Sex  
723 differences in Alzheimer disease — the gateway to precision medicine. *Nature Reviews*  
724 *Neurology* 14, 457–469. <https://doi.org/10.1038/s41582-018-0032-9>
- 725 Fiorito, G., Polidoro, S., Dugué, P.-A., Kivimaki, M., Ponzi, E., Matullo, G., Guarrera, S., Assumma,  
726 M.B., Georgiadis, P., Kyrtopoulos, S.A., Krogh, V., Palli, D., Panico, S., Sacerdote, C., Tumino,  
727 R., Chadeau-Hyam, M., Stringhini, S., Severi, G., Hodge, A.M., Giles, G.G., Marioni, R., Linnér,  
728 R.K., O’Halloran, A.M., Kenny, R.A., Layte, R., Baglietto, L., Robinson, O., McCrory, C.,  
729 Milne, R.L., Vineis, P., 2017. Social adversity and epigenetic aging: a multi-cohort study on  
730 socioeconomic differences in peripheral blood DNA methylation. *Scientific Reports* 7, 16266.  
731 <https://doi.org/10.1038/s41598-017-16391-5>
- 732 Fitten, L.J., Ortiz, F., Fairbanks, L., Bartzokis, G., Lu, P., Klein, E., Coppola, G., Ringman, J., 2014.  
733 Younger age of dementia diagnosis in a Hispanic population in southern California. *Int J Geriatr*  
734 *Psychiatry* 29, 586–593. <https://doi.org/10.1002/gps.4040>
- 735 Fleisher, A., Grundman, M., Jack, C.R., Petersen, R.C., Taylor, C., Kim, H.T., Schiller, D.H.B., Bagwell,  
736 V., Sencakova, D., Weiner, M.F., DeCarli, C., DeKosky, S.T., Dyck, C.H. van, Thal, L.J., 2005.  
737 Sex, Apolipoprotein E  $\epsilon$ 4 Status, and Hippocampal Volume in Mild Cognitive Impairment. *Arch*  
738 *Neurol* 62, 953–957. <https://doi.org/10.1001/archneur.62.6.953>
- 739 Fortin, J.-P., Triche, T.J., Hansen, K.D., 2017. Preprocessing, normalization and integration of the  
740 Illumina HumanMethylationEPIC array with minfi. *Bioinformatics* 33, 558–560.  
741 <https://doi.org/10.1093/bioinformatics/btw691>
- 742 Gale, C.R., Marioni, R.E., Harris, S.E., Starr, J.M., Deary, I.J., 2018. DNA methylation and the epigenetic  
743 clock in relation to physical frailty in older people: the Lothian Birth Cohort 1936. *Clin*  
744 *Epigenetics* 10. <https://doi.org/10.1186/s13148-018-0538-4>
- 745 Ghosh, S., Wu, M.D., Shafiq, S.S., Kyrkanides, S., LaFerla, F.M., Olschowka, J.A., O’Banion, M.K.,  
746 2013. Sustained interleukin-1 $\beta$  overexpression exacerbates tau pathology despite reduced  
747 amyloid burden in an Alzheimer’s mouse model. *J. Neurosci.* 33, 5053–5064.  
748 <https://doi.org/10.1523/JNEUROSCI.4361-12.2013>
- 749 Gibbons, L.E., Carle, A.C., Mackin, R.S., Harvey, D., Mukherjee, S., Insel, P., Curtis, S.M., Mungas, D.,  
750 Crane, P.K., Alzheimer’s Disease Neuroimaging Initiative, 2012. A composite score for  
751 executive functioning, validated in Alzheimer’s Disease Neuroimaging Initiative (ADNI)  
752 participants with baseline mild cognitive impairment. *Brain Imaging Behav* 6, 517–527.  
753 <https://doi.org/10.1007/s11682-012-9176-1>

- 754 Gong, C., Wei, D., Wang, Y., Ma, J., Yuan, C., Zhang, W., Yu, G., Zhao, Y., 2016. A Meta-Analysis of  
755 C-Reactive Protein in Patients With Alzheimer's Disease. *Am J Alzheimers Dis Other Demen* 31,  
756 194–200. <https://doi.org/10.1177/1533317515602087>
- 757 GTEx Project, 2018. The Genotype-Tissue Expression (GTEx) Project was supported by the Common  
758 Fund of the Office of the Director of the National Institutes of Health, and by NCI, NHGRI,  
759 NHLBI, NIDA, NIMH, and NINDS. The data used for the analyses described in this manuscript  
760 were obtained from the GTEx Portal record for "APOE" on 11/04/18.
- 761 Hannum, G., Guinney, J., Zhao, L., Zhang, L., Hughes, G., Sada, S., Klotzle, B., Bibikova, M., Fan, J.-  
762 B., Gao, Y., Deconde, R., Chen, M., Rajapakse, I., Friend, S., Ideker, T., Zhang, K., 2013.  
763 Genome-wide Methylation Profiles Reveal Quantitative Views of Human Aging Rates.  
764 *Molecular Cell* 49, 359–367. <https://doi.org/10.1016/j.molcel.2012.10.016>
- 765 Heneka, M.T., Carson, M.J., Khoury, J.E., Landreth, G.E., Brosseron, F., Feinstein, D.L., Jacobs, A.H.,  
766 Wyss-Coray, T., Vitorica, J., Ransohoff, R.M., Herrup, K., Frautschy, S.A., Finsen, B., Brown,  
767 G.C., Verkhratsky, A., Yamanaka, K., Koistinaho, J., Latz, E., Halle, A., Petzold, G.C., Town, T.,  
768 Morgan, D., Shinohara, M.L., Perry, V.H., Holmes, C., Bazan, N.G., Brooks, D.J., Hunot, S.,  
769 Joseph, B., Deigendesch, N., Garaschuk, O., Boddeke, E., Dinarello, C.A., Breitner, J.C., Cole,  
770 G.M., Golenbock, D.T., Kummer, M.P., 2015. Neuroinflammation in Alzheimer's disease. *The*  
771 *Lancet Neurology* 14, 388–405. [https://doi.org/10.1016/S1474-4422\(15\)70016-5](https://doi.org/10.1016/S1474-4422(15)70016-5)
- 772 Henriques, A.D., Benedet, A.L., Camargos, E.F., Rosa-Neto, P., Nóbrega, O.T., 2018. Fluid and imaging  
773 biomarkers for Alzheimer's disease: Where we stand and where to head to. *Experimental*  
774 *Gerontology* 107, 169–177. <https://doi.org/10.1016/j.exger.2018.01.002>
- 775 Heppner, F.L., Ransohoff, R.M., Becher, B., 2015. Immune attack: the role of inflammation in Alzheimer  
776 disease. *Nature Reviews Neuroscience* 16, 358–372. <https://doi.org/10.1038/nrn3880>
- 777 Holland, D., Desikan, R.S., Dale, A.M., McEvoy, L.K., Alzheimer's Disease Neuroimaging Initiative,  
778 2013. Higher rates of decline for women and apolipoprotein E epsilon4 carriers. *AJNR Am J*  
779 *Neuroradiol* 34, 2287–2293. <https://doi.org/10.3174/ajnr.A3601>
- 780 Horvath, S., 2013. DNA methylation age of human tissues and cell types. *Genome Biol* 14, R115.  
781 <https://doi.org/10.1186/gb-2013-14-10-r115>
- 782 Horvath, S., Garagnani, P., Bacalini, M.G., Pirazzini, C., Salvioli, S., Gentilini, D., Di Blasio, A.M.,  
783 Giuliani, C., Tung, S., Vinters, H.V., Franceschi, C., 2015. Accelerated epigenetic aging in Down  
784 syndrome. *Aging Cell* 14, 491–495. <https://doi.org/10.1111/accel.12325>
- 785 Horvath, S., Gurven, M., Levine, M.E., Trumble, B.C., Kaplan, H., Allayee, H., Ritz, B.R., Chen, B., Lu,  
786 A.T., Rickabaugh, T.M., Jamieson, B.D., Sun, D., Li, S., Chen, W., Quintana-Murci, L., Fagny,  
787 M., Kobor, M.S., Tsao, P.S., Reiner, A.P., Edlefsen, K.L., Absher, D., Assimes, T.L., 2016. An  
788 epigenetic clock analysis of race/ethnicity, sex, and coronary heart disease. *Genome Biol* 17.  
789 <https://doi.org/10.1186/s13059-016-1030-0>
- 790 Horvath, S., Ritz, B.R., 2015. Increased epigenetic age and granulocyte counts in the blood of Parkinson's  
791 disease patients. *Aging (Albany NY)* 7, 1130–1142.
- 792 Houseman, E.A., Accomando, W.P., Koestler, D.C., Christensen, B.C., Marsit, C.J., Nelson, H.H.,  
793 Wiencke, J.K., Kelsey, K.T., 2012. DNA methylation arrays as surrogate measures of cell  
794 mixture distribution. *BMC Bioinformatics* 13, 86. <https://doi.org/10.1186/1471-2105-13-86>
- 795 Hua, X., Hibar, D.P., Lee, S., Toga, A.W., Jack, C.R., Weiner, M.W., Thompson, P.M., 2010. Sex and  
796 age differences in atrophic rates: an ADNI study with n=1368 MRI scans. *Neurobiology of Aging*  
797 31, 1463–1480. <https://doi.org/10.1016/j.neurobiolaging.2010.04.033>
- 798 Hubacek, J.A., Peasey, A., Pikhart, H., Stavek, P., Kubinova, R., Marmot, M., Bobak, M., 2010. APOE  
799 polymorphism and its effect on plasma C-reactive protein levels in a large general population  
800 sample. *Hum Immunol* 71, 304–308. <https://doi.org/10.1016/j.humimm.2010.01.008>
- 801 Irvine, K., Laws, K.R., Gale, T.M., Kondel, T.K., 2012. Greater cognitive deterioration in women than  
802 men with Alzheimer's disease: a meta analysis. *J Clin Exp Neuropsychol* 34, 989–998.  
803 <https://doi.org/10.1080/13803395.2012.712676>

- 804 Jack, C.R., Dickson, D.W., Parisi, J.E., Xu, Y.C., Cha, R.H., O'Brien, P.C., Edland, S.D., Smith, G.E.,  
805 Boeve, B.F., Tangalos, E.G., Kokmen, E., Petersen, R.C., 2002. Antemortem MRI Findings  
806 Correlate with Hippocampal Neuropathology in Typical Aging and Dementia. *Neurology* 58,  
807 750–757.
- 808 Jack, C.R., Petersen, R.C., Xu, Y., O'Brien, P.C., Smith, G.E., Ivnik, R.J., Boeve, B.F., Tangalos, E.G.,  
809 Kokmen, E., 2000. Rates of hippocampal atrophy correlate with change in clinical status in aging  
810 and AD. *Neurology* 55, 484–489. <https://doi.org/10.1212/wnl.55.4.484>
- 811 Jack, C.R., Wiste, H.J., Weigand, S.D., Knopman, D.S., Vemuri, P., Mielke, M.M., Lowe, V., Senjem,  
812 M.L., Gunter, J.L., Machulda, M.M., Gregg, B.E., Pankratz, V.S., Rocca, W.A., Petersen, R.C.,  
813 2015. Age, Sex, and APOE  $\epsilon$ 4 Effects on Memory, Brain Structure, and  $\beta$ -Amyloid Across the  
814 Adult Life Span. *JAMA Neurol* 72, 511–519. <https://doi.org/10.1001/jamaneurol.2014.4821>
- 815 Khera, A., McGuire, D.K., Murphy, S.A., Stanek, H.G., Das, S.R., Vongpatanasin, W., Wians, F.H.,  
816 Grundy, S.M., de Lemos, J.A., 2005. Race and gender differences in C-reactive protein levels. *J.*  
817 *Am. Coll. Cardiol.* 46, 464–469. <https://doi.org/10.1016/j.jacc.2005.04.051>
- 818 Kidron, D., Black, S.E., Stanchev, P., Buck, B., Szalai, J.P., Parker, J., Szekely, C., Bronskill, M.J., 1997.  
819 Quantitative MR volumetry in Alzheimer's disease: Topographic markers and the effects of sex  
820 and education. *Neurology* 49, 1504–1512. <https://doi.org/10.1212/WNL.49.6.1504>
- 821 Kinney, J.W., Bemiller, S.M., Murtishaw, A.S., Leisgang, A.M., Salazar, A.M., Lamb, B.T., 2018.  
822 Inflammation as a central mechanism in Alzheimer's disease. *Alzheimer's & Dementia:*  
823 *Translational Research & Clinical Interventions* 4, 575–590.  
824 <https://doi.org/10.1016/j.trci.2018.06.014>
- 825 Klein, S.L., Flanagan, K.L., 2016. Sex differences in immune responses. *Nature Reviews Immunology*  
826 16, 626–638. <https://doi.org/10.1038/nri.2016.90>
- 827 Koenig, W., Sund, M., Fröhlich, M., Fischer, H.G., Löwel, H., Döring, A., Hutchinson, W.L., Pepys,  
828 M.B., 1999. C-Reactive protein, a sensitive marker of inflammation, predicts future risk of  
829 coronary heart disease in initially healthy middle-aged men: results from the MONICA  
830 (Monitoring Trends and Determinants in Cardiovascular Disease) Augsburg Cohort Study, 1984  
831 to 1992. *Circulation* 99, 237–242. <https://doi.org/10.1161/01.cir.99.2.237>
- 832 Koran, M.E.I., Hohman, T.J., 2017. Sex differences in the association between AD biomarkers and  
833 cognitive decline. *Brain Imaging and Behavior* 11, 205–213. <https://doi.org/10.1007/s11682-016-9523-8>
- 834  
835 Koran, M.E.I., Wagener, M., Hohman, T.J., Alzheimer's Neuroimaging Initiative, 2017. Sex differences  
836 in the association between AD biomarkers and cognitive decline. *Brain Imaging Behav* 11, 205–  
837 213. <https://doi.org/10.1007/s11682-016-9523-8>
- 838 Koyama, A., O'Brien, J., Weuve, J., Blacker, D., Metti, A.L., Yaffe, K., 2013. The role of peripheral  
839 inflammatory markers in dementia and Alzheimer's disease: a meta-analysis. *J. Gerontol. A Biol.*  
840 *Sci. Med. Sci.* 68, 433–440. <https://doi.org/10.1093/gerona/gls187>
- 841 Levine, M.E., Lu, A.T., Bennett, D.A., Horvath, S., 2015. Epigenetic age of the pre-frontal cortex is  
842 associated with neuritic plaques, amyloid load, and Alzheimer's disease related cognitive  
843 functioning. *Aging (Albany NY)* 7, 1198–1211.
- 844 Levine, M.E., Lu, A.T., Quach, A., Chen, B.H., Assimes, T.L., Bandinelli, S., Hou, L., Baccarelli, A.A.,  
845 Stewart, J.D., Li, Y., Whitsel, E.A., Wilson, J.G., Reiner, A.P., Aviv, A., Lohman, K., Liu, Y.,  
846 Ferrucci, L., Horvath, S., 2018. An epigenetic biomarker of aging for lifespan and healthspan.  
847 *Aging (Albany NY)* 10, 573–591. <https://doi.org/10.18632/aging.101414>
- 848 Lewis, J., Dickson, D.W., Lin, W.-L., Chisholm, L., Corral, A., Jones, G., Yen, S.-H., Sahara, N.,  
849 Skipper, L., Yager, D., Eckman, C., Hardy, J., Hutton, M., McGowan, E., 2001. Enhanced  
850 Neurofibrillary Degeneration in Transgenic Mice Expressing Mutant Tau and APP. *Science, New*  
851 *Series* 293, 1487–1491.
- 852 Li, B., Shi, J., Gutman, B.A., Baxter, L.C., Thompson, P.M., Caselli, R.J., Wang, Y., 2016. Influence of  
853 APOE Genotype on Hippocampal Atrophy over Time - An N=1925 Surface-Based ADNI Study.  
854 *PLoS One* 11. <https://doi.org/10.1371/journal.pone.0152901>

- 855 Lin, K.A., Choudhury, K.R., Rathakrishnan, B.G., Marks, D.M., Petrella, J.R., Doraiswamy, P.M., 2015.  
856 Marked gender differences in progression of mild cognitive impairment over 8 years.  
857 *Alzheimer's & Dementia: Translational Research & Clinical Interventions* 1, 103–110.  
858 <https://doi.org/10.1016/j.trci.2015.07.001>
- 859 Lotze, M., Domin, M., Gerlach, F.H., Gaser, C., Lueders, E., Schmidt, C.O., Neumann, N., 2019. Novel  
860 findings from 2,838 Adult Brains on Sex Differences in Gray Matter Brain Volume. *Scientific*  
861 *Reports* 9, 1671. <https://doi.org/10.1038/s41598-018-38239-2>
- 862 Lu, A.T., Quach, A., Wilson, J.G., Reiner, A.P., Aviv, A., Raj, K., Hou, L., Baccarelli, A.A., Li, Y.,  
863 Stewart, J.D., Whitsel, E.A., Assimes, T.L., Ferrucci, L., Horvath, S., 2019. DNA methylation  
864 GrimAge strongly predicts lifespan and healthspan. *Aging (Albany NY)* 11, 303–327.  
865 <https://doi.org/10.18632/aging.101684>
- 866 Mayeda, E.R., Glymour, M.M., Quesenberry, C.P., Whitmer, R.A., 2016. Inequalities in dementia  
867 incidence between six racial and ethnic groups over 14 years. *Alzheimer's & Dementia* 12, 216–  
868 224. <https://doi.org/10.1016/j.jalz.2015.12.007>
- 869 McEwen, L.M., Jones, M.J., Lin, D.T.S., Edgar, R.D., Husquin, L.T., MacIsaac, J.L., Ramadori, K.E.,  
870 Morin, A.M., Rider, C.F., Carlsten, C., Quintana-Murci, L., Horvath, S., Kobor, M.S., 2018.  
871 Systematic evaluation of DNA methylation age estimation with common preprocessing methods  
872 and the Infinium MethylationEPIC BeadChip array. *Clinical Epigenetics* 10, 123.  
873 <https://doi.org/10.1186/s13148-018-0556-2>
- 874 McEwen, L.M., Morin, A.M., Edgar, R.D., MacIsaac, J.L., Jones, M.J., Dow, W.H., Rosero-Bixby, L.,  
875 Kobor, M.S., Rehkopf, D.H., 2017. Differential DNA methylation and lymphocyte proportions in  
876 a Costa Rican high longevity region. *Epigenetics Chromatin* 10. [https://doi.org/10.1186/s13072-](https://doi.org/10.1186/s13072-017-0128-2)  
877 [017-0128-2](https://doi.org/10.1186/s13072-017-0128-2)
- 878 Mielke, M.M., Vemuri, P., Rocca, W.A., 2014. Clinical epidemiology of Alzheimer's disease: assessing  
879 sex and gender differences. *Clin Epidemiol* 6, 37–48. <https://doi.org/10.2147/CLEP.S37929>
- 880 Motta, M., Imbesi, R., Di Rosa, M., Stivala, F., Malaguarnera, L., 2007. Altered plasma cytokine levels in  
881 Alzheimer's disease: Correlation with the disease progression. *Immunology Letters* 114, 46–51.  
882 <https://doi.org/10.1016/j.imlet.2007.09.002>
- 883 Mungas, D., Beckett, L., Harvey, D., Farias, S.T., Reed, B., Carmichael, O., Olichney, J., Miller, J.,  
884 DeCarli, C., 2010. Heterogeneity of Cognitive Trajectories in Diverse Older Person. *Psychol*  
885 *Aging* 25, 606–619. <https://doi.org/10.1037/a0019502>
- 886 Murphy, D.G.M., DeCarli, C., McIntosh, A.R., Daly, E., Mentis, M.J., Pietrini, P., Szczepanik, J.,  
887 Schapiro, M.B., Grady, C.L., Horwitz, B., Rapoport, S.I., 1996. Sex Differences in Human Brain  
888 Morphometry and Metabolism: An In Vivo Quantitative Magnetic Resonance Imaging and  
889 Positron Emission Tomography Study on the Effect of Aging. *Arch Gen Psychiatry* 53, 585–594.  
890 <https://doi.org/10.1001/archpsyc.1996.01830070031007>
- 891 Nebel, R.A., Aggarwal, N.T., Barnes, L.L., Gallagher, A., Goldstein, J.M., Kantarci, K., Mallampalli,  
892 M.P., Mormino, E.C., Scott, L., Yu, W.H., Maki, P.M., Mielke, M.M., 2018. Understanding the  
893 impact of sex and gender in Alzheimer's disease: A call to action. *Alzheimer's & Dementia* 14,  
894 1171–1183. <https://doi.org/10.1016/j.jalz.2018.04.008>
- 895 Neu, S.C., Pa, J., Kukull, W., Beekly, D., Kuzma, A., Gangadharan, P., Wang, L.-S., Romero, K.,  
896 Arneric, S.P., Redolfi, A., Orlandi, D., Frisoni, G.B., Au, R., Devine, S., Auerbach, S., Espinosa,  
897 A., Boada, M., Ruiz, A., Johnson, S.C., Kosciak, R., Wang, J.-J., Hsu, W.-C., Chen, Y.-L., Toga,  
898 A.W., 2017. Apolipoprotein E Genotype and Sex Risk Factors for Alzheimer Disease: A Meta-  
899 analysis. *JAMA Neurology* 74, 1178. <https://doi.org/10.1001/jamaneurol.2017.2188>
- 900 Ng, A., Tam, W.W., Zhang, M.W., Ho, C.S., Husain, S.F., McIntyre, R.S., Ho, R.C., 2018. IL-1 $\beta$ , IL-6,  
901 TNF- $\alpha$  and CRP in Elderly Patients with Depression or Alzheimer's disease: Systematic Review  
902 and Meta-Analysis. *Scientific Reports* 8, 12050. <https://doi.org/10.1038/s41598-018-30487-6>
- 903 Ossenkoppele, R., Jansen, W.J., Rabinovici, G.D., Knol, D.L., van der Flier, W.M., van Berckel, B.N.M.,  
904 Scheltens, P., Visser, P.J., Verfaillie, S.C.J., Zwan, M.D., Adriaanse, S.M., Lammertsma, A.A.,  
905 Barkhof, F., Jagust, W.J., Miller, B.L., Rosen, H.J., Landau, S.M., Villemagne, V.L., Rowe, C.C.,



- 906 Lee, D.Y., Na, D.L., Seo, S.W., Sarazin, M., Roe, C.M., Sabri, O., Barthel, H., Koglin, N.,  
907 Hodges, J., Leyton, C.E., Vandenberghe, R., van Laere, K., Drzezga, A., Forster, S., Grimmer, T.,  
908 Sánchez-Juan, P., Carril, J.M., Mok, V., Camus, V., Klunk, W.E., Cohen, A.D., Meyer, P.T.,  
909 Hellwig, S., Newberg, A., Frederiksen, K.S., Fleisher, A.S., Mintun, M.A., Wolk, D.A.,  
910 Nordberg, A., Rinne, J.O., Chételat, G., Lleo, A., Blesa, R., Fortea, J., Madsen, K., Rodrigue,  
911 K.M., Brooks, D.J., 2015. Prevalence of Amyloid PET Positivity in Dementia Syndromes: A  
912 Meta-analysis. *JAMA* 313, 1939. <https://doi.org/10.1001/jama.2015.4669>
- 913 Petersen, R.C., Jack, C.R., Xu, Y.C., Waring, S.C., O'Brien, P.C., Smith, G.E., Ivnik, R.J., Tangalos,  
914 E.G., Boeve, B.F., Kokmen, E., 2000. Memory and MRI-based hippocampal volumes in aging  
915 and AD. *Neurology* 54, 581–587. <https://doi.org/10.1212/wnl.54.3.581>
- 916 Pievani, M., Galluzzi, S., Thompson, P.M., Rasser, P.E., Bonetti, M., Frisoni, G.B., 2011. APOE4 is  
917 associated with greater atrophy of the hippocampal formation in Alzheimer's disease.  
918 *Neuroimage* 55, 909–919. <https://doi.org/10.1016/j.neuroimage.2010.12.081>
- 919 R Core Team, 2018. R: A language and environment for statistical computing. R Foundation for  
920 Statistical Computing, Vienna, Austria. R Foundation for Statistical Computing, Vienna, Austria.
- 921 Ridker, P.M., Buring, J.E., Shih, J., Matias, M., Hennekens, C.H., 1998. Prospective study of C-reactive  
922 protein and the risk of future cardiovascular events among apparently healthy women. *Circulation*  
923 98, 731–733. <https://doi.org/10.1161/01.cir.98.8.731>
- 924 Riedel, B.C., Thompson, P.M., Brinton, R.D., 2016. Age, APOE and sex: Triad of risk of Alzheimer's  
925 disease. *The Journal of Steroid Biochemistry and Molecular Biology* 160, 134–147.  
926 <https://doi.org/10.1016/j.jsbmb.2016.03.012>
- 927 Ritchie, S.J., Cox, S.R., Shen, X., Lombardo, M.V., Reus, L.M., Alloza, C., Harris, M.A., Alderson, H.L.,  
928 Hunter, S., Neilson, E., Liewald, D.C.M., Auyeung, B., Whalley, H.C., Lawrie, S.M., Gale, C.R.,  
929 Bastin, M.E., McIntosh, A.M., Deary, I.J., 2018. Sex Differences in the Adult Human Brain:  
930 Evidence from 5216 UK Biobank Participants. *Cereb Cortex* 28, 2959–2975.  
931 <https://doi.org/10.1093/cercor/bhy109>
- 932 Rosa, M.D., Dell'Ombra, N., Zambito, A.M., Malaguarnera, M., Nicoletti, F., Malaguarnera, L., 2006.  
933 Chitotriosidase and inflammatory mediator levels in Alzheimer's disease and cerebrovascular  
934 dementia. *European Journal of Neuroscience* 23, 2648–2656. <https://doi.org/10.1111/j.1460-9568.2006.04780.x>
- 936 Shaftel, S.S., Carlson, T.J., Olschowka, J.A., Kyrkanides, S., Matousek, S.B., O'Banion, M.K., 2007.  
937 Chronic interleukin-1beta expression in mouse brain leads to leukocyte infiltration and  
938 neutrophil-independent blood brain barrier permeability without overt neurodegeneration. *J.*  
939 *Neurosci.* 27, 9301–9309. <https://doi.org/10.1523/JNEUROSCI.1418-07.2007>
- 940 Sharp, E.S., Gatz, M., 2011. The Relationship between Education and Dementia An Updated Systematic  
941 Review. *Alzheimer Dis Assoc Disord* 25, 289–304.  
942 <https://doi.org/10.1097/WAD.0b013e318211c83c>
- 943 Shi, J., Leporé, N., Gutman, B.A., Thompson, P.M., Baxter, L.C., Caselli, R.J., Wang, Y., Alzheimer's  
944 Disease Neuroimaging Initiative, 2014. Genetic influence of apolipoprotein E4 genotype on  
945 hippocampal morphometry: An N = 725 surface-based Alzheimer's disease neuroimaging  
946 initiative study. *Hum Brain Mapp* 35, 3903–3918. <https://doi.org/10.1002/hbm.22447>
- 947 Sohn, D., Shpanskaya, K., Lucas, J.E., Petrella, J.R., Saykin, A.J., Tanzi, R.E., Samatova, N.F.,  
948 Doraiswamy, P.M., 2018. Sex Differences in Cognitive Decline in Subjects with High Likelihood  
949 of Mild Cognitive Impairment due to Alzheimer's disease. *Scientific Reports* 8, 7490.  
950 <https://doi.org/10.1038/s41598-018-25377-w>
- 951 Steenland, K., Goldstein, F.C., Levey, A., Wharton, W., 2016. A Meta-Analysis of Alzheimer's Disease  
952 Incidence and Prevalence Comparing African-Americans and Caucasians. *J. Alzheimers Dis.* 50,  
953 71–76. <https://doi.org/10.3233/JAD-150778>
- 954 Stern, Y., 2002. What is cognitive reserve? Theory and research application of the reserve concept. *J Int*  
955 *Neuropsychol Soc* 8, 448–460.

- 956 Sundermann, E.E., Biegon, A., Rubin, L.H., Lipton, R.B., Landau, S., Maki, P.M., Alzheimer's Disease  
957 Neuroimaging Initiative, 2017. Does the Female Advantage in Verbal Memory Contribute to  
958 Underestimating Alzheimer's Disease Pathology in Women versus Men? *J. Alzheimers Dis.* 56,  
959 947–957. <https://doi.org/10.3233/JAD-160716>
- 960 Sundermann, E.E., Biegon, A., Rubin, L.H., Lipton, R.B., Mowrey, W., Landau, S., Maki, P.M., 2016.  
961 Better verbal memory in women than men in MCI despite similar levels of hippocampal atrophy.  
962 *Neurology* 86, 1368–1376. <https://doi.org/10.1212/WNL.0000000000002570>
- 963 Sundermann, E.E., Tran, M., Maki, P.M., Bondi, M.W., 2018. Sex differences in the association between  
964 apolipoprotein E  $\epsilon$ 4 allele and Alzheimer's disease markers. *Alzheimer's & Dementia: Diagnosis,*  
965 *Assessment & Disease Monitoring* 10, 438–447. <https://doi.org/10.1016/j.dadm.2018.06.004>
- 966 Swardfager, W., Lanctôt, K., Rothenburg, L., Wong, A., Cappell, J., Herrmann, N., 2010. A Meta-  
967 Analysis of Cytokines in Alzheimer's Disease. *Biological Psychiatry* 68, 930–941.  
968 <https://doi.org/10.1016/j.biopsych.2010.06.012>
- 969 Tan, A., Ma, W., Vira, A., Marwha, D., Eliot, L., 2016. The human hippocampus is not sexually-  
970 dimorphic: Meta-analysis of structural MRI volumes. *NeuroImage* 124, 350–366.  
971 <https://doi.org/10.1016/j.neuroimage.2015.08.050>
- 972 Teschendorff, A.E., Marabita, F., Lechner, M., Bartlett, T., Tegner, J., Gomez-Cabrero, D., Beck, S.,  
973 2013. A beta-mixture quantile normalization method for correcting probe design bias in Illumina  
974 Infinium 450 k DNA methylation data. *Bioinformatics* 29, 189–196.  
975 <https://doi.org/10.1093/bioinformatics/bts680>
- 976 Triche, T.J., Weisenberger, D.J., Van Den Berg, D., Laird, P.W., Siegmund, K.D., 2013. Low-level  
977 processing of Illumina Infinium DNA Methylation BeadArrays. *Nucleic Acids Res* 41, e90.  
978 <https://doi.org/10.1093/nar/gkt090>
- 979 Vasanthakumar, A., Davis, J.W., Idler, K., Kim, S., Nho, K., Nudelman, K.N.H., Faber, K., Bai, Y.,  
980 Foroud, T.M., Estrada, K., Li, Q., Saykin, A.J., Waring, J., 2017. DNA METHYLATION  
981 DYNAMICS IN ALZHEIMER'S DISEASE DIAGNOSIS AND PROGRESSION. *Alzheimer's*  
982 *& Dementia* 13, P297. <https://doi.org/10.1016/j.jalz.2017.06.209>
- 983 Walters, A., Phillips, E., Zheng, R., Biju, M., Kuruvilla, T., 2016. Evidence for neuroinflammation in  
984 Alzheimer's disease: Neuroinflammation in Alzheimer's. *Progress in Neurology and Psychiatry*  
985 20, 25–31. <https://doi.org/10.1002/pnp.444>
- 986 Winblad, B., Amouyel, P., Andrieu, S., Ballard, C., Brayne, C., Brodaty, H., Cedazo-Minguez, A.,  
987 Dubois, B., Edvardsson, D., Feldman, H., Fratiglioni, L., Frisoni, G.B., Gauthier, S., Georges, J.,  
988 Graff, C., Iqbal, K., Jessen, F., Johansson, G., Jönsson, L., Kivipelto, M., Knapp, M.,  
989 Mangialasche, F., Melis, R., Nordberg, A., Rikkert, M.O., Qiu, C., Sakmar, T.P., Scheltens, P.,  
990 Schneider, L.S., Sperling, R., Tjernberg, L.O., Waldemar, G., Wimo, A., Zetterberg, H., 2016.  
991 Defeating Alzheimer's disease and other dementias: a priority for European science and society.  
992 *The Lancet Neurology* 15, 455–532. [https://doi.org/10.1016/S1474-4422\(16\)00062-4](https://doi.org/10.1016/S1474-4422(16)00062-4)
- 993 Xu, W., Tan, Lan, Wang, H.-F., Jiang, T., Tan, M.-S., Tan, Lin, Zhao, Q.-F., Li, J.-Q., Wang, J., Yu, J.-  
994 T., 2015. Meta-analysis of modifiable risk factors for Alzheimer's disease. *J Neurol Neurosurg*  
995 *Psychiatry* 86, 1299–1306. <https://doi.org/10.1136/jnnp-2015-310548>
- 996 Yokoyama, A.S., Rutledge, J.C., Medici, V., 2017. DNA methylation alterations in Alzheimer's disease.  
997 *Environ Epigenet* 3. <https://doi.org/10.1093/eep/dvx008>
- 998 Yun, Y.-W., Kweon, S.-S., Choi, J.-S., Rhee, J.-A., Lee, Y.-H., Nam, H.-S., Jeong, S.-K., Park, K.-S.,  
999 Ryu, S.-Y., Choi, S.-W., Kim, H.N., Cauley, J.A., Shin, M.-H., 2015. APOE Polymorphism Is  
1000 Associated with C-reactive Protein Levels but Not with White Blood Cell Count: Dong-gu Study  
1001 and Namwon Study. *J Korean Med Sci* 30, 860–865. <https://doi.org/10.3346/jkms.2015.30.7.860>  
1002

**Table 1.** Demographic and clinical information for all participants and subdivided by sex. Biomarkers for AD are from cerebrospinal fluid. P-values after adjusting for age are presented here for easier comparison and are taken from the linear model of sex and diagnosis (see Table 3 for details).

bioRxiv preprint doi: <https://doi.org/10.1101/741777>; this version posted August 23, 2019. The copyright holder for this preprint (which was not certified by peer review) is the author/funder, who has granted bioRxiv a license to display the preprint in perpetuity. It is made available under aCC-BY-NC-ND 4.0 International license.

|                                                 | Total<br>No. 1,460       | Female<br>No. 630        | Male<br>No. 830          | P-value  | P-value (adjusted<br>for age) |
|-------------------------------------------------|--------------------------|--------------------------|--------------------------|----------|-------------------------------|
| <b>Age</b>                                      |                          |                          |                          |          |                               |
| Mean (SD)                                       | 74.13 ( $\pm$ 7.25)      | 73.15 ( $\pm$ 7.28)      | 74.87 ( $\pm$ 7.14)      | < 0.0001 |                               |
| <b>Education (years)</b>                        |                          |                          |                          |          |                               |
| Mean (SD)                                       | 15.83 ( $\pm$ 2.88)      | 15.15 ( $\pm$ 2.79)      | 16.34 ( $\pm$ 2.85)      | < 0.0001 |                               |
| <b>Ethnicity</b>                                |                          |                          |                          |          |                               |
| White                                           | 1,352 (92.60%)           | 573 (90.95%)             | 779 (93.86%)             | 0.043    |                               |
| Not white                                       | 108 (7.40%)              | 57 (9.05%)               | 51 (6.14%)               |          |                               |
| <b>Baseline diagnosis</b>                       |                          |                          |                          |          |                               |
| CN                                              | 341 (23.4%)              | 168 (26.7%)              | 173 (20.8%)              | 0.013    |                               |
| EMCI                                            | 257 (17.6%)              | 108 (17.1%)              | 149 (18.0%)              |          |                               |
| LMCI                                            | 533 (36.5%)              | 205 (32.5%)              | 328 (39.5%)              |          |                               |
| AD                                              | 329 (22.5%)              | 149 (23.7%)              | 180 (21.7%)              |          |                               |
| <b>APOE<math>\epsilon</math>4 allele number</b> |                          |                          |                          |          |                               |
| 0                                               | 702 (48.08%)             | 300 (47.62%)             | 402 (48.43%)             | 0.8      |                               |
| 1                                               | 574 (39.32%)             | 252 (40.00%)             | 322 (38.80%)             |          |                               |
| 2                                               | 170 (11.64%)             | 70 (11.11%)              | 100 (12.05%)             |          |                               |
| Missing                                         | 14 (0.96%)               | 8 (1.27%)                | 6 (0.72%)                |          |                               |
| <b>Volume of hippocampus</b>                    |                          |                          |                          |          |                               |
| Mean (SD)                                       | 6659.47 ( $\pm$ 1176.42) | 6446.71 ( $\pm$ 1169.97) | 6822.86 ( $\pm$ 1155.87) | < 0.0001 |                               |
| Missing                                         | 226 (15.48%)             | 94 (14.92%)              | 132 (15.90%)             |          |                               |
| <b>Volume of hippocampus (corrected)</b>        |                          |                          |                          |          |                               |
| Mean (SD)                                       | 0.00436 ( $\pm$ 0.00080) | 0.00454 ( $\pm$ 0.00082) | 0.00423 ( $\pm$ 0.00076) | < 0.0001 | <0.0001                       |
| Missing                                         | 226 (15.48%)             | 94 (14.92%)              | 132 (15.90%)             |          |                               |
| <b>Amyloid Beta</b>                             |                          |                          |                          |          |                               |
| Mean (SD)                                       | 830.97 ( $\pm$ 358.04)   | 856.41 ( $\pm$ 346.87)   | 812.44 ( $\pm$ 365.16)   | 0.016    | 0.38                          |
| Missing                                         | 513 (35.14%)             | 231 (36.67%)             | 282 (33.98%)             |          |                               |
| <b>Tau</b>                                      |                          |                          |                          |          |                               |
| Mean (SD)                                       | 294.38 ( $\pm$ 137.27)   | 314.56 ( $\pm$ 152.70)   | 279.70 ( $\pm$ 122.91)   | 0.002    | <0.0001                       |
| Missing                                         | 513 (35.14%)             | 231 (36.67%)             | 282 (33.98%)             |          |                               |
| <b>PTau</b>                                     |                          |                          |                          |          |                               |
| Mean (SD)                                       | 28.89 ( $\pm$ 15.31)     | 30.87 ( $\pm$ 16.95)     | 27.44 ( $\pm$ 13.83)     | 0.007    | <0.0001                       |
| Missing                                         | 513 (35.14%)             | 231 (36.67%)             | 282 (33.98%)             |          |                               |
| <b>Executive Function (ADNI_EF)</b>             |                          |                          |                          |          |                               |
| Mean (SD)                                       | 0.02 ( $\pm$ 0.96)       | 0.06 ( $\pm$ 0.97)       | -0.00 ( $\pm$ 0.95)      | 0.20     | <0.0001                       |
| Missing                                         | 311 (21.30%)             | 145 (23.02%)             | 166 (20.00%)             |          |                               |
| <b>Memory (ADNI_MEM)</b>                        |                          |                          |                          |          |                               |
| Mean (SD)                                       | 0.10 ( $\pm$ 0.87)       | 0.21 ( $\pm$ 0.94)       | 0.02 ( $\pm$ 0.80)       | 0.0006   | <0.0001                       |
| Missing                                         | 310 (21.23%)             | 145 (23.02%)             | 165 (19.88%)             |          |                               |

P-values are from Wilcoxon rank sum tests for continuous variables and Fisher's exact tests for categorical variables. Missing refers to number of individuals and the percent of the total cohort that had missing data for that variable

**Table 2.** Demographic and clinical information for subset of ADNI data subdivided by sex. A. Participants with measured biomarkers in cerebrospinal fluid (CSF), B. Participants with available whole blood Illumina HumanMethylationEPIC DNA methylation data, C. Participants with matched Illumina HumanMethylationEPIC DNA methylation array data and measured CSF biomarkers. In all three subdata sets, females were significantly younger and had fewer years of education than males. In data set A (but not B and C), more females (24.0 % compared to 21.8%) were diagnosed with AD, more females were cognitively normal (26.5% compared to 22.9%) and fewer females were diagnosed with late MCI compared to males (49.5% compared to 55.3%). In data set A, females had lower CSF cortisol, interleukin-3, interleukin 8, interleukin-16, immunoglobulin A, and intercellular adhesion molecule compared to males. Empty cells indicate data not available.

|                                                | A                |                          |                 |          | B                |                          |                 |         | C                 |                          |                   |          |
|------------------------------------------------|------------------|--------------------------|-----------------|----------|------------------|--------------------------|-----------------|---------|-------------------|--------------------------|-------------------|----------|
|                                                | Total<br>No. 279 | Sex<br>Female<br>No. 109 | Male<br>No. 170 | P-value  | Total<br>No. 640 | Sex<br>Female<br>No. 284 | Male<br>No. 356 | P-value | Total<br>No. 533  | Sex<br>Female<br>No. 243 | Male<br>No. 290   | P-value  |
| <b>Age</b>                                     |                  |                          |                 |          |                  |                          |                 |         |                   |                          |                   |          |
| Mean (SD)                                      | 75.15 (±6.86)    | 73.75 (±6.69)            | 76.04 (±6.83)   | 0.007    | 75.63 (±7.68)    | 74.78 (±8.03)            | 76.31 (±7.32)   | <0.0001 | 75.01 (±7.61)     | 74.31 (±8.10)            | 75.61 (±7.11)     | 0.0019   |
| <b>Education (years)</b>                       |                  |                          |                 |          |                  |                          |                 |         |                   |                          |                   |          |
| Mean (SD)                                      | 16.21 (±2.70)    | 15.53 (±2.59)            | 16.75 (±2.68)   | <0.0001  | 16.21 (±2.70)    | 15.53 (±2.59)            | 16.75 (±2.68)   | <0.0001 | 16.24 (±2.64)     | 15.57 (±2.49)            | 16.83 (±2.64)     | < 0.0001 |
| <b>Ethnicity</b>                               |                  |                          |                 |          |                  |                          |                 |         |                   |                          |                   |          |
| White                                          | 267 (95.70%)     | 103 (94.50%)             | 164 (96.47%)    | 0.55     | 627 (97.97%)     | 279 (98.23 %)            | 348 (97.75%)    | 0.78    | 521 (97.75 %)     | 238 (97.94 %)            | 283 (97.94 %)     | 0.99     |
| Not White <sup>†</sup>                         | 12 (4.30%)       | 6 (5.50%)                | 6 (3.53%)       |          | 13 (2.03%)       | 5 (1.76%)                | 8 (2.25%)       |         | 12 (2.25 %)       | 5 (2.06 %)               | 7 (2.41 %)        |          |
| <b>Baseline diagnosis</b>                      |                  |                          |                 |          |                  |                          |                 |         |                   |                          |                   |          |
| CN                                             | 74 (26.5%)       | 35 (32.1%)               | 39 (22.9%)      | 0.051    | 217 (33.9%)      | 109 (38.38%)             | 108 (30.34%)    | 0.11    | 171 (32.08 %)     | 88 (36.21 %)             | 83 (28.62 %)      | 0.19     |
| EMCI                                           | n/a              | n/a                      | n/a             |          | 186 (29.06%)     | 83 (29.23%)              | 103 (28.93%)    |         | 173 (32.46 %)     | 79 (32.51 %)             | 94 (32.41 %)      |          |
| LMCI                                           | 138 (49.5%)      | 44 (40.4%)               | 94 (55.3%)      |          | 200 (31.25%)     | 78 (27.46%)              | 122 (34.27%)    |         | 155 (29.08 %)     | 94 (38.68 %)             | 92 (31.72 %)      |          |
| AD                                             | 67 (24.0%)       | 30 (27.5%)               | 37 (21.8%)      |          | 37 (5.78%)       | 14 (4.23 %)              | 23 (6.46%)      |         | 34 (6.38 %)       | 13 (5.35 %)              | 21 (7.24 %)       |          |
| <b>APOEε4 allele number</b>                    |                  |                          |                 |          |                  |                          |                 |         |                   |                          |                   |          |
| 0                                              | 134 (48.03%)     | 51 (46.79%)              | 83 (48.82%)     | 0.78     | 369 (57.66 %)    | 169 (59.51%)             | 200 (56.18%)    | 0.37    | 313 (58.72 %)     | 146 (60.08 %)            | 167 (57.59 %)     | 0.45     |
| 1                                              | 109 (39.07%)     | 42 (38.53%)              | 67 (39.41%)     |          | 220 (34.38%)     | 97 (34.15%)              | 123 (34.55%)    |         | 173 (32.46%)      | 80 (32.92 %)             | 93 (32.07 %)      |          |
| 2                                              | 36 (12.90%)      | 16 (14.68%)              | 20 (11.76%)     |          | 51 (7.97%)       | 18 (6.34%)               | 33 (9.27%)      |         | 47 (8.82%)        | 17 (7.00%)               | 30 (10.34 %)      |          |
| <b>Cortisol (ng/mL)</b>                        |                  |                          |                 |          |                  |                          |                 |         |                   |                          |                   |          |
| Mean (SD)                                      | 16.05 (±6.04)    | 14.92 (±6.01)            | 16.78 (±5.96)   | 0.008    |                  |                          |                 |         |                   |                          |                   |          |
| <b>C reactive protein (ug/mL)</b>              |                  |                          |                 |          |                  |                          |                 |         |                   |                          |                   |          |
| Mean (SD)                                      | -2.83 (±0.56)    | -2.77 (±0.64)            | -2.87 (±0.51)   | 0.23     |                  |                          |                 |         |                   |                          |                   |          |
| <b>CD40 antigen (ng/mL)</b>                    |                  |                          |                 |          |                  |                          |                 |         |                   |                          |                   |          |
| Mean (SD)                                      | -0.65 (±0.12)    | -0.66 (±0.10)            | -0.64 (±0.14)   | 0.12     |                  |                          |                 |         |                   |                          |                   |          |
| <b>Interleukin 16 (pg/mL)</b>                  |                  |                          |                 |          |                  |                          |                 |         |                   |                          |                   |          |
| Mean (SD)                                      | 0.91 (±0.18)     | 0.87 (±0.17)             | 0.94 (±0.19)    | 0.004    |                  |                          |                 |         |                   |                          |                   |          |
| <b>Interleukin 3 (ng/mL)</b>                   |                  |                          |                 |          |                  |                          |                 |         |                   |                          |                   |          |
| Mean (SD)                                      | -2.22 (±0.32)    | -2.28 (±0.29)            | -2.17 (±0.34)   | 0.001    |                  |                          |                 |         |                   |                          |                   |          |
| <b>Interleukin 6 receptor (ng/mL)</b>          |                  |                          |                 |          |                  |                          |                 |         |                   |                          |                   |          |
| Mean (SD)                                      | -0.01 (±0.15)    | -0.02 (±0.14)            | -0.00 (±0.15)   | 0.30     |                  |                          |                 |         |                   |                          |                   |          |
| <b>Interleukin 8 (pg/mL)</b>                   |                  |                          |                 |          |                  |                          |                 |         |                   |                          |                   |          |
| Mean (SD)                                      | 1.68 (±0.15)     | 1.64 (±0.11)             | 1.70 (±0.16)    | 0.001    |                  |                          |                 |         |                   |                          |                   |          |
| <b>Intercellular adhesion molecule (ng/mL)</b> |                  |                          |                 |          |                  |                          |                 |         |                   |                          |                   |          |
| Mean (SD)                                      | 0.96 (±0.44)     | 0.83 (±0.33)             | 1.04 (±0.48)    | 0.0001   |                  |                          |                 |         |                   |                          |                   |          |
| <b>Immunoglobulin A (mg/mL)</b>                |                  |                          |                 |          |                  |                          |                 |         |                   |                          |                   |          |
| Mean (SD)                                      | -2.54 (±0.31)    | -2.68 (±0.26)            | -2.45 (±0.31)   | < 0.0001 |                  |                          |                 |         |                   |                          |                   |          |
| <b>Executive Function Score</b>                |                  |                          |                 |          |                  |                          |                 |         |                   |                          |                   |          |
| Mean (SD)                                      |                  |                          |                 |          | 0.36 (±0.98)     | 0.38 (±1.01)             | 0.34 (±0.95)    | 0.17    |                   |                          |                   |          |
| <b>Memory Score</b>                            |                  |                          |                 |          |                  |                          |                 |         |                   |                          |                   |          |
| Mean (SD)                                      |                  |                          |                 |          | 0.40 (±0.92)     | 0.57 (±1.01)             | 0.26 (±0.82)    | <0.0001 |                   |                          |                   |          |
| <b>Amyloid Beta</b>                            |                  |                          |                 |          |                  |                          |                 |         |                   |                          |                   |          |
| Mean (SD)                                      |                  |                          |                 |          |                  |                          |                 |         | 1040.98 (±454.72) | 1055.50 (±449.23)        | 1028.35 (±459.36) | 0.18     |
| <b>Tau</b>                                     |                  |                          |                 |          |                  |                          |                 |         |                   |                          |                   |          |
| Mean (SD)                                      |                  |                          |                 |          |                  |                          |                 |         | 289.80 (±124.68)  | 300.90 (±139.07)         | 280.13 (±109.82)  | 0.072    |
| <b>PTau</b>                                    |                  |                          |                 |          |                  |                          |                 |         |                   |                          |                   |          |
| Mean (SD)                                      |                  |                          |                 |          |                  |                          |                 |         | 27.47 (±13.65)    | 28.25 (±15.08)           | 26.78 (±12.24)    | 0.36     |

P-values are from Wilcoxon rank sum tests for continuous variables and Fisher's exact tests for categorical variables. Includes self-reported Black, Asian, American Indian/Alaskan, and >1 ethnicity.

**Table 3.** Linear regression results for models with sex and APOE status. Only shown are the models with significant associations. All model summaries are available in Supplementary Table S1.

| Predictors                               | ADNI MEM      |               |                   | ADNI EF       |               |                   | ABETA         |                   |                   | Hippocampus/Intracranial volume |                      |                   | TAU           |                  |               | PTAU          |                |              |
|------------------------------------------|---------------|---------------|-------------------|---------------|---------------|-------------------|---------------|-------------------|-------------------|---------------------------------|----------------------|-------------------|---------------|------------------|---------------|---------------|----------------|--------------|
|                                          | Estimates     | CI            | adjusted p        | Estimates     | CI            | adjusted p        | Estimates     | CI                | adjusted p        | Estimates                       | CI                   | adjusted p        | Estimates     | CI               | adjusted p    | Estimates     | CI             | adjusted p   |
| (Intercept)                              | 1.63          | 1.12 – 2.14   |                   | 2.05          | 1.47 – 2.62   |                   | 1458.67       | 1247.77 – 1669.57 |                   | 0.00752                         | 0.00709 – 0.00795    |                   | 56.15         | -30.03 – 142.34  |               | 4.75          | -4.89 – 14.38  |              |
| AGE (years)                              | -0.02         | -0.02 – -0.01 |                   | -0.02         | -0.03 – -0.02 |                   | -6.19         | -9.01 – -3.36     |                   | -0.00004                        | -0.0004 – -0.0003    |                   | 2.68          | 1.54 – 3.81      |               | 0.26          | 0.13 – 0.39    |              |
| Male (ref = Female)                      | -0.17         | -0.26 – -0.07 | <b>0.002</b>      | -0.03         | -0.14 – 0.08  | 0.68              | -29.77        | -71.55 – 12.01    | 0.28              | -0.00024                        | -0.00033 – -0.00016  | <b>&lt;0.0001</b> | -7.37         | -31.43 – 16.70   |               | -0.34         | -3.03 – 2.35   |              |
| APOE status (ref = 0 alleles)            |               |               | <b>&lt;0.0001</b> |               |               | <b>&lt;0.0001</b> |               |                   | <b>&lt;0.0001</b> |                                 |                      | <b>&lt;0.0001</b> |               |                  |               |               |                |              |
| 1 allele                                 | -0.45         | -0.55 – -0.34 |                   | -0.3          | -0.42 – -0.19 |                   | -240.23       | -284.27 – -196.20 |                   | -0.00031                        | --0.0004 – -0.00022  |                   | 104.14        | 77.21 – 131.06   |               | 11.73         | 8.72 – 14.74   |              |
| 2 alleles                                | -0.69         | -0.85 – -0.53 |                   | -0.46         | -0.64 – -0.28 |                   | -455.95       | -521.02 – -390.88 |                   | -0.00057                        | -0.00071 – --0.00044 |                   | 178.88        | 137.45 – 220.31  |               | 19.81         | 15.18 – 24.44  |              |
| Interaction term                         |               |               |                   |               |               |                   |               |                   |                   |                                 |                      |                   |               |                  | <b>0.0008</b> |               |                | <b>0.001</b> |
| Male:1 allele                            |               |               |                   |               |               |                   |               |                   |                   |                                 |                      |                   | -49.76        | -85.30 – -14.22  |               | -5.58         | -9.55 – -1.60  |              |
| Male:2 alleles                           |               |               |                   |               |               |                   |               |                   |                   |                                 |                      |                   | -101.56       | -153.97 – -49.16 |               | -10.78        | -16.64 – -4.92 |              |
| Observations                             |               |               |                   |               |               |                   |               |                   | 947               |                                 |                      | 1224              |               |                  | 947           |               |                | 947          |
| R <sup>2</sup> / adjusted R <sup>2</sup> | 0.106 / 0.103 |               |                   | 0.058 / 0.055 |               |                   | 0.203 / 0.199 |                   |                   | 0.191/0.189                     |                      |                   | 0.140 / 0.134 |                  |               | 0.136 / 0.130 |                |              |

bioRxiv preprint doi: <https://doi.org/10.1101/741777>; this version posted August 23, 2019. The copyright holder for this preprint (which was not certified by peer review) is the author/funder, who has granted bioRxiv a license to display the preprint in perpetuity. It is made available under aCC-BY-NC-ND 4.0 International license.

**Table 3.** Continued

| Predictors                               | C Reactive Protein ug/ml |               |              | Interleukin 16 pg/ml |               |             | Interleukin 8.II. 8.pg m L |              |             | Immunoglobulin A mg/ml |               |                   | Intercellular Adhesion Molecule 1 ng/ml |              |              |
|------------------------------------------|--------------------------|---------------|--------------|----------------------|---------------|-------------|----------------------------|--------------|-------------|------------------------|---------------|-------------------|-----------------------------------------|--------------|--------------|
|                                          | Estimates                | CI            | adjusted p   | Estimates            | CI            | adjusted p  | Estimates                  | CI           | adjusted p  | Estimates              | CI            | adjusted p        | Estimates                               | CI           | adjusted p   |
| (Intercept)                              | -3.05                    | -3.79 – -2.32 |              | 0.35                 | 0.10 – 0.59   |             | 1.38                       | 1.18 – 1.57  |             | -2.82                  | -3.22 – -2.43 |                   | -0.19                                   | -0.75 – 0.36 |              |
| AGE (years)                              | 0.01                     | -0.00 – 0.02  |              | 0.01                 | 0.00 – 0.01   |             | 0                          | 0.00 – 0.01  |             | 0                      | -0.00 – 0.01  |                   | 0.01                                    | 0.01 – 0.02  |              |
| Male (ref = Female)                      | -0.12                    | -0.26 – 0.01  | 0.15         | 0.12                 | 0.06 – 0.18   |             | 0.1                        | 0.05 – 0.15  | <b>0.01</b> | 0.21                   | 0.14 – 0.29   | <b>&lt;0.0001</b> | 0.18                                    | 0.07 – 0.28  | <b>0.002</b> |
| APOE status (ref = 0 alleles)            |                          |               | <b>0.007</b> |                      |               |             |                            |              | 0.33        |                        |               | 0.27              |                                         |              | 0.31         |
| 1 allele                                 | -0.19                    | -0.33 – -0.05 |              | 0.08                 | 0.01 – 0.16   |             | 0.04                       | -0.02 – 0.10 |             | 0.02                   | -0.05 – 0.10  |                   | 0.09                                    | -0.01 – 0.20 |              |
| 2 alleles                                | -0.31                    | -0.52 – -0.10 |              | 0.06                 | -0.04 – 0.16  |             | 0.01                       | -0.07 – 0.09 |             | -0.09                  | -0.20 – 0.02  |                   | 0.02                                    | -0.13 – 0.18 |              |
| Interaction term                         |                          |               |              |                      |               | <b>0.02</b> |                            |              |             |                        |               |                   |                                         |              |              |
| Male:1 allele                            |                          |               |              | -0.13                | -0.22 – -0.03 |             |                            |              |             |                        |               |                   |                                         |              |              |
| Male:2 alleles                           |                          |               |              | -0.15                | -0.28 – -0.02 |             |                            |              |             |                        |               |                   |                                         |              |              |
| Observations                             |                          |               | 279          |                      | 279           |             |                            |              | 279         |                        |               | 279               |                                         |              | 279          |
| R <sup>2</sup> / adjusted R <sup>2</sup> | 0.058 / 0.045            |               |              | 0.117 / 0.098        |               |             | 0.092 / 0.072              |              |             | 0.135 / 0.122          |               |                   | 0.107 / 0.094                           |              |              |

**Table 4.** Linear regression results for models with sex and baseline diagnosis. Only shown are the models with significant associations. P-values are for overall tests and are FDR-adjusted. All model summaries are available in Supplementary Table S2.

| Predictors                               | ADNI MEM    |               |                   | ADNI EF     |               |                   | ABETA       |                   |                   | Hippocampus/Intracranial volume |                     |                   | TAU           |                 |                   | PTAU          |               |                   |
|------------------------------------------|-------------|---------------|-------------------|-------------|---------------|-------------------|-------------|-------------------|-------------------|---------------------------------|---------------------|-------------------|---------------|-----------------|-------------------|---------------|---------------|-------------------|
|                                          | Estimates   | CI            | adjusted p        | Estimates   | CI            | adjusted p        | Estimates   | CI                | adjusted p        | Estimates                       | CI                  | adjusted p        | Estimates     | CI              | adjusted p        | Estimates     | CI            | adjusted p        |
| (Intercept)                              | 1.79        | 1.45 – 2.13   |                   | 2.26        | 1.80 – 2.73   |                   | 1161.57     | 944.04 – 1379.10  |                   | 0.00747                         | 0.00710 – 0.00785   |                   | 154.16        | 70.57 – 237.75  |                   | 15.72         | 6.36 – 25.09  |                   |
| AGE (years)                              | -0.01       | -0.01 – -0.00 |                   | -0.02       | -0.03 – -0.01 |                   | -1.64       | -4.52 – 1.24      |                   | -0.00003                        | -0.00004 – -0.00003 |                   | 1.25          | 0.15 – 2.36     |                   | 0.1           | -0.02 – 0.23  |                   |
| Male (ref = Female)                      | -0.16       | -0.23 – -0.09 | <b>&lt;0.0001</b> | -0.04       | -0.13 – 0.05  | 0.53              | -26.62      | -69.46 – 16.22    | 0.38              | -0.00022                        | -0.00029 – -0.00015 | <b>&lt;0.0001</b> | -42.59        | -59.05 – -26.13 | <b>&lt;0.0001</b> | -4.22         | -6.06 – -2.38 | <b>&lt;0.0001</b> |
| Diagnosis (ref = CN)                     |             |               | <b>&lt;0.0001</b> |             |               | <b>&lt;0.0001</b> |             |                   | <b>&lt;0.0001</b> |                                 |                     | <b>&lt;0.0001</b> |               |                 | <b>&lt;0.0001</b> |               |               | <b>&lt;0.0001</b> |
| EMCI                                     | -0.5        | -0.61 – -0.39 |                   | -0.42       | -0.56 – -0.27 |                   | -85.2       | -148.82 – -21.59  |                   | -0.00016                        | -0.00027 – -0.00005 |                   | 37.85         | 13.41 – 62.30   |                   | 4.22          | 1.48 – 6.96   |                   |
| LMCI                                     | -1.08       | -1.16 – -1.00 |                   | -0.79       | -0.90 – -0.67 |                   | -256.85     | -315.81 – -197.89 |                   | -0.00073                        | -0.00083 – -0.00064 |                   | 93.34         | 70.69 – 116.00  |                   | 10.58         | 8.05 – 13.12  |                   |
| AD                                       | -1.84       | -1.94 – -1.75 |                   | -1.63       | -1.76 – -1.50 |                   | -390.48     | -453.59 – -327.37 |                   | -0.00106                        | -0.00116 – -0.00096 |                   | 143.6         | 119.55 – 167.8  |                   | 15.81         | 13.10 – 18.53 |                   |
| Observations                             | 1150        |               |                   | 1149        |               |                   | 947         |                   |                   | 1234                            |                     |                   | 947           |                 |                   | 947           |               |                   |
| R <sup>2</sup> / adjusted R <sup>2</sup> | 0.58 / 0.58 |               |                   | 0.58 / 0.58 |               |                   | 0.18 / 0.16 |                   |                   | 0.398 / 0.396                   |                     |                   | 0.164 / 0.160 |                 |                   | 0.156 / 0.152 |               |                   |

bioRxiv preprint doi: <https://doi.org/10.1101/741777>; this version posted August 23, 2019. The copyright holder for this preprint (which was not certified by peer review) is the author/funder, who has granted bioRxiv a license to display the preprint in perpetuity. It is made available under aCC-BY-NC-ND 4.0 International license.

**Table 4.** Continued

| Predictors                               | Interleukin 16 pg/ml |              |            | Interleukin 8 pg/ml |              |             | Immunoglobulin A mg/ml |               |                   | Intercellular Adhesion Molecule 1 ng/ml |              |              |
|------------------------------------------|----------------------|--------------|------------|---------------------|--------------|-------------|------------------------|---------------|-------------------|-----------------------------------------|--------------|--------------|
|                                          | Estimates            | CI           | adjusted p | Estimates           | CI           | adjusted p  | Estimates              | CI            | adjusted p        | Estimates                               | CI           | adjusted p   |
| (Intercept)                              | 0.42                 | 0.18 – 0.65  |            | 1.4                 | 1.20 – 1.59  |             | -2.9                   | -3.29 – -2.50 |                   | -0.22                                   | -0.77 – 0.33 |              |
| AGE (years)                              | 0.01                 | 0.00 – 0.01  |            | 0                   | 0.00 – 0.01  |             | 0                      | -0.00 – 0.01  |                   | 0.01                                    | 0.01 – 0.02  |              |
| Male (ref = Female)                      | 0.05                 | 0.01 – 0.10  | 0.06       | 0.05                | 0.01 – 0.09  | <b>0.02</b> | 0.21                   | 0.14 – 0.29   | <b>&lt;0.0001</b> | 0.17                                    | 0.06 – 0.27  | <b>0.006</b> |
| Diagnosis (ref = CN)                     |                      |              | 0.64       |                     |              | 0.96        |                        |               | 0.98              |                                         |              | 0.67         |
| EMCI                                     |                      |              |            |                     |              |             |                        |               |                   |                                         |              |              |
| LMCI                                     | 0.01                 | -0.04 – 0.06 |            | 0.01                | -0.03 – 0.05 |             | 0                      | -0.08 – 0.09  |                   | 0.06                                    | -0.06 – 0.18 |              |
| AD                                       | -0.03                | -0.08 – 0.03 |            | 0.01                | -0.04 – 0.06 |             | -0.01                  | -0.11 – 0.09  |                   | 0.02                                    | -0.12 – 0.16 |              |
| Observations                             | 279                  |              |            | 279                 |              |             | 279                    |               |                   | 279                                     |              |              |
| R <sup>2</sup> / adjusted R <sup>2</sup> | 0.089 / 0.075        |              |            | 0.059 / 0.045       |              |             | 0.123 / 0.111          |               |                   | 0.101 / 0.088                           |              |              |

**Table 5.** Results of epigenetic age and epigenetic age acceleration calculation for all DNAm analyses, for both the larger DNAm cohort and the subset of samples with matched CSF biomarker data.

|                                            | DNAm Cohort         |                     |                     |         | DNAm & CSF Biomarker Data Cohort |                     |                     |         |
|--------------------------------------------|---------------------|---------------------|---------------------|---------|----------------------------------|---------------------|---------------------|---------|
|                                            | Total No. 640       | Sex                 |                     | P-value | Total No. 533                    | Sex                 |                     | P-value |
|                                            |                     | Female No. 284      | Male No. 356        |         |                                  | Female No. 243      | Male No. 290        |         |
| <b>Age</b>                                 |                     |                     |                     |         |                                  |                     |                     |         |
| Mean (SD)                                  | 75.63 ( $\pm$ 7.68) | 74.78 ( $\pm$ 8.03) | 76.31 ( $\pm$ 7.32) | <0.0001 | 75.01 ( $\pm$ 7.61)              | 74.31 ( $\pm$ 8.10) | 75.61 ( $\pm$ 7.11) | 0.0019  |
| <b>Epigenetic Age (years)</b>              |                     |                     |                     |         |                                  |                     |                     |         |
| Mean (SD)                                  | 69.92 ( $\pm$ 8.06) | 67.45 ( $\pm$ 8.15) | 70.11 ( $\pm$ 7.79) | <0.0001 | 68.47 ( $\pm$ 8.17)              | 67.05 ( $\pm$ 8.33) | 69.72 ( $\pm$ 7.82) | <0.0001 |
| <b>Epigenetic Age Acceleration (years)</b> |                     |                     |                     |         |                                  |                     |                     |         |
| Mean (SD)                                  | 0.025 ( $\pm$ 4.22) | -0.14 ( $\pm$ 4.16) | 0.16 ( $\pm$ 4.26)  | 0.1     | 0.027 ( $\pm$ 4.30)              | -0.18 ( $\pm$ 4.23) | 0.20 (4.35)         | 0.057   |
| <b>Intrinsic Age Acceleration (years)</b>  |                     |                     |                     |         |                                  |                     |                     |         |
| Mean (SD)                                  | 0.026 ( $\pm$ 4.11) | -0.19 ( $\pm$ 4.06) | 0.20 ( $\pm$ 4.15)  | 0.019   | 0.020 ( $\pm$ 4.18)              | -0.25 ( $\pm$ 4.14) | 0.26 ( $\pm$ 4.21)  | 0.021   |

P-values are from Wilcoxon rank sum tests for continuous variables and Fisher's exact tests for categorical variables

**Table 6.** Linear model for assessment of relationship of biochemical concentrations and APOE genotype on universal epigenetic age acceleration. Intrinsic epigenetic age acceleration linear model not shown.

| <b>Age Acceleration &amp; CSF Biomarkers</b> |                  |                   |                   |
|----------------------------------------------|------------------|-------------------|-------------------|
| <i>Predictors</i>                            | <i>Estimates</i> | <i>CI</i>         | <i>adjusted p</i> |
| (Intercept)                                  | -1.18            | -2.80 – 0.45      | 0.517             |
| Male (ref = Female)                          | 0.65             | -0.61 – 1.37      | 0.448             |
| Diagnosis (ref = CN)                         |                  |                   |                   |
| EMCI                                         | 0.77             | -0.12 – 1.65      | 0.09              |
| LMCI                                         | 0.47             | -0.51 – 1.45      | 0.569             |
| AD                                           | 0.54             | -1.10 – 2.19      | 0.738             |
| APOE status (ref = 0 alleles)                |                  |                   |                   |
| 1 allele                                     | -0.031           | -0.09 – 0.84      | 0.945             |
| 2 alleles                                    | -0.3             | -1.75 – 1.14      | 0.813             |
| CSF Amyloid Beta                             | 0.00018          | -0.00083 – 0.0011 | 0.813             |
| CSF Tau                                      | 0.0078           | -0.0077 – 0.023   | 0.569             |
| CSF PTau                                     | -0.072           | -0.22 – 0.072     | 0.569             |
| Observations                                 |                  |                   | 533               |
| R <sup>2</sup> / adjusted R <sup>2</sup>     | 0.0143/-0.00262  |                   |                   |



**Figure 1**

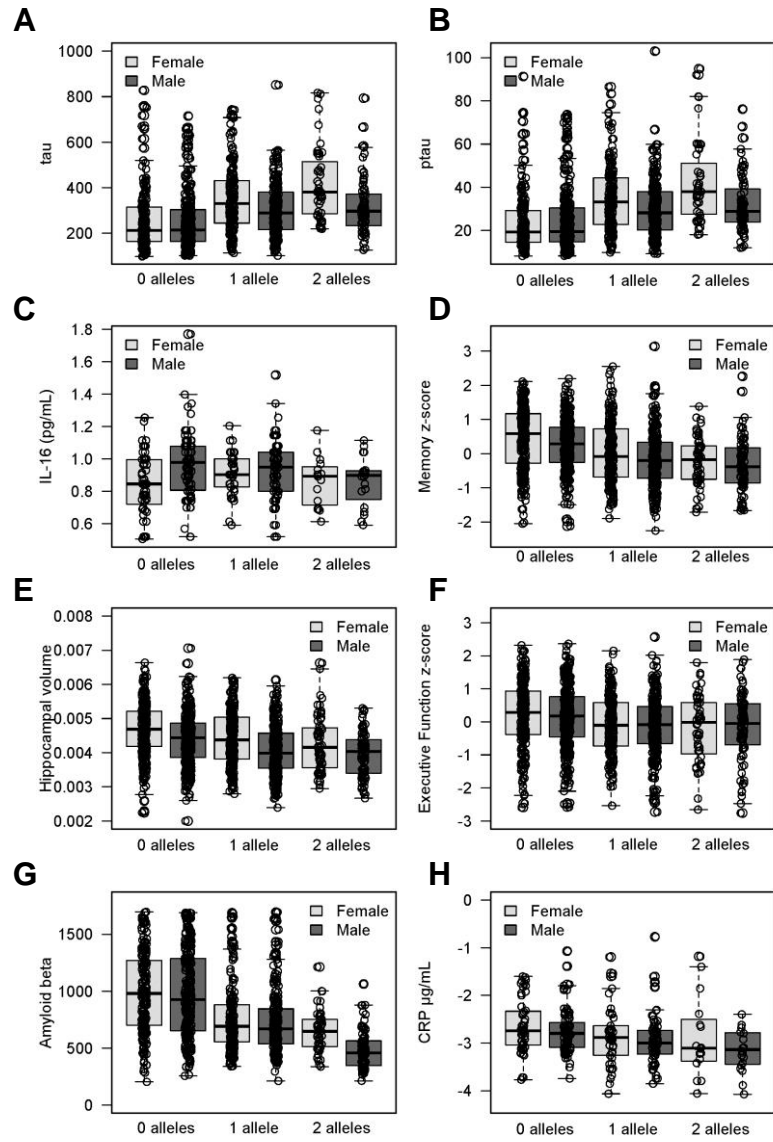

Figure 2

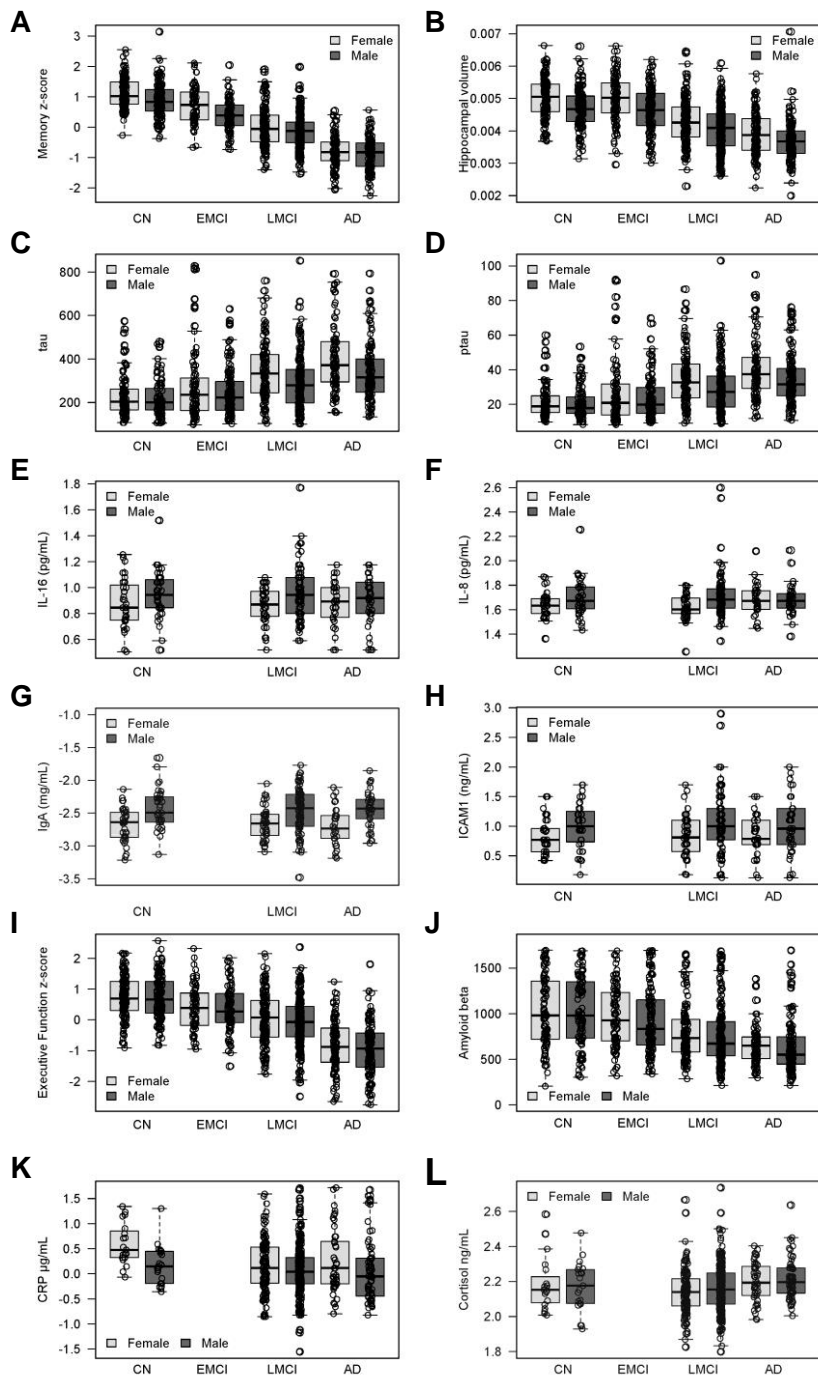

Figure 3

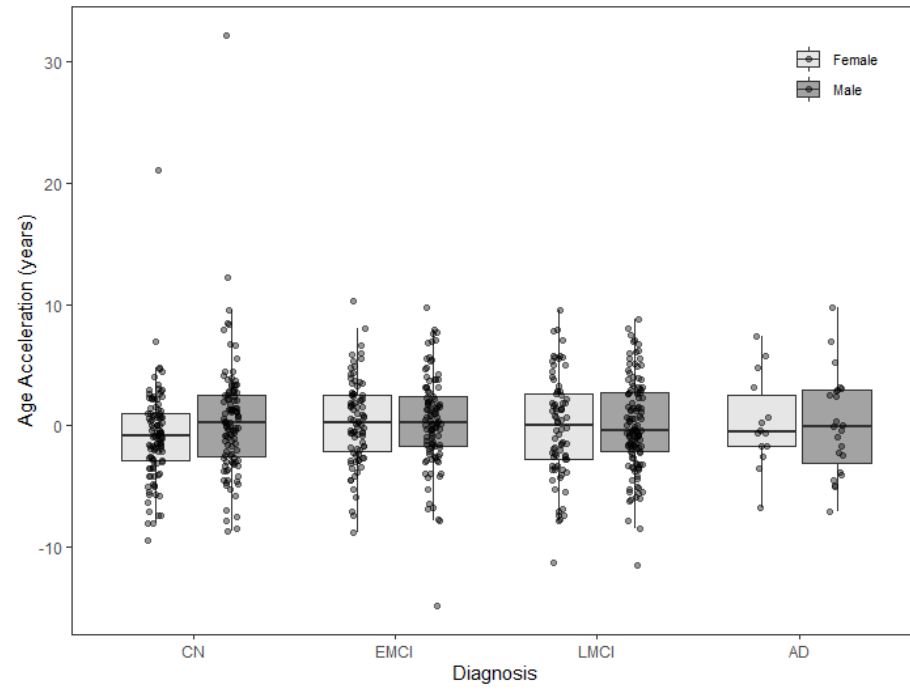

## Supplemental File

### Sex and APOE genotype influence AD neuropathology but not epigenetic age across diagnosis

Paula Duarte-Guterman<sup>1\*</sup>, Amy M. Inkster<sup>2,3\*</sup>, Arianne Y. Albert<sup>4</sup>, Cindy Barha<sup>5</sup>, Wendy P. Robinson<sup>2,3</sup>, Liisa A.M. Galea<sup>1</sup>, on behalf of the Alzheimer's Disease Neuroimaging Initiative<sup>δ</sup>

1. Djavad Mowafaghian Centre for Brain Health and Department of Psychology, University of British Columbia, Vancouver, BC, Canada
2. Department of Medical Genetics, University of British Columbia, Vancouver, BC, Canada.
3. BC Children's Hospital Research Institute, Vancouver, BC, Canada
4. Women's Health Research Institute of British Columbia, Vancouver, BC, Canada
5. Djavad Mowafaghian Centre for Brain Health and Department of Physical Therapy, University of British Columbia, Vancouver, BC, Canada

**Table S1.** Linear regression results for all variables investigated by sex and APOE status. Markers in CSF

| Predictors                               | ADNI MEM      |               |                   | ADNI EF       |               |                   | ABETA         |                   |                   | Hippocampus/Intracranial volume |                     |                   | TAU           |                 |                  | PTAU          |               |                | Cortisol Cortisol ng/ml |              |            | C Reactive Protein ug/ml |               |              |
|------------------------------------------|---------------|---------------|-------------------|---------------|---------------|-------------------|---------------|-------------------|-------------------|---------------------------------|---------------------|-------------------|---------------|-----------------|------------------|---------------|---------------|----------------|-------------------------|--------------|------------|--------------------------|---------------|--------------|
|                                          | Estimates     | CI            | adjusted p        | Estimates     | CI            | adjusted p        | Estimates     | CI                | adjusted p        | Estimates                       | CI                  | adjusted p        | Estimates     | CI              | adjusted p       | Estimates     | CI            | adjusted p     | Estimates               | CI           | adjusted p | Estimates                | CI            | adjusted p   |
| (Intercept)                              | 1.63          | 1.12 – 2.14   |                   | 2.05          | 1.47 – 2.62   |                   | 1458.67       | 1247.77 – 1669.57 |                   | 0.00752                         | 0.00709 – 0.00795   |                   | 56.15         | -30.03 – 142.34 |                  | 4.75          | -4.89 – 14.38 |                | -1.38                   | -9.15 – 6.39 |            | -3.05                    | -3.79 – -2.32 |              |
| AGE (years)                              | -0.02         | -0.02 – -0.01 |                   | -0.02         | -0.03 – -0.02 |                   | -6.19         | -9.01 – -3.36     |                   | -0.00004                        | -0.0004 – -0.0003   |                   | 2.68          | 1.54 – 3.81     |                  | 0.26          | 0.13 – 0.39   |                | 0.21                    | 0.11 – 0.32  |            | 0.01                     | -0.00 – 0.02  |              |
| Male (ref = Female)                      | -0.17         | -0.26 – -0.07 | <b>0.002</b>      | -0.03         | -0.14 – 0.08  | 0.68              | -29.77        | -71.55 – 12.01    | 0.28              | -0.00024                        | -0.00033 – -0.00016 | <b>&lt;0.0001</b> | -7.37         | -31.43 – 16.70  |                  | -0.34         | -3.03 – 2.35  |                | 1.37                    | -0.05 – 2.78 | 0.12       | -0.12                    | -0.26 – 0.01  | 0.15         |
| APOE status (ref = 0 alleles)            |               |               | <b>&lt;0.0001</b> |               |               | <b>&lt;0.0001</b> |               |                   | <b>&lt;0.0001</b> |                                 |                     | <b>&lt;0.0001</b> |               |                 |                  |               |               |                |                         |              | 0.52       |                          |               | <b>0.007</b> |
| 1 allele                                 | -0.45         | -0.55 – -0.34 |                   | -0.3          | -0.42 – -0.19 |                   | -240.23       | -284.27 – -196.20 |                   | -0.00031                        | -0.0004 – -0.00022  |                   | 104.14        | 77.21 – 131.06  |                  | 11.73         | 8.72 – 14.74  |                | 1.03                    | -0.44 – 2.50 |            | -0.19                    | -0.33 – -0.05 |              |
| 2 alleles                                | -0.69         | -0.85 – -0.53 |                   | -0.46         | -0.64 – -0.28 |                   | -455.95       | -521.02 – -390.88 |                   | -0.00057                        | -0.00071 – -0.00044 |                   | 178.88        | 137.45 – 220.31 |                  | 19.81         | 15.18 – 24.44 |                | 0.5                     | -1.68 – 2.68 |            | -0.31                    | -0.52 – -0.10 |              |
| Interaction term                         |               |               |                   |               |               |                   |               |                   |                   |                                 |                     |                   |               | <b>0.0008</b>   |                  |               |               | <b>0.001</b>   |                         |              |            |                          |               |              |
| Male:1 allele                            |               |               |                   |               |               |                   |               |                   |                   |                                 |                     |                   |               | -49.76          | -85.30 – -14.22  |               | -5.58         | -9.55 – -1.60  |                         |              |            |                          |               |              |
| Male:2 alleles                           |               |               |                   |               |               |                   |               |                   |                   |                                 |                     |                   |               | -101.56         | -153.97 – -49.16 |               | -10.78        | -16.64 – -4.92 |                         |              |            |                          |               |              |
| Observations                             |               |               | 1145              |               |               | 1144              |               |                   | 947               |                                 |                     | 1224              |               |                 | 947              |               |               | 947            |                         |              | 279        |                          |               | 279          |
| R <sup>2</sup> / adjusted R <sup>2</sup> | 0.106 / 0.103 |               |                   | 0.058 / 0.055 |               |                   | 0.203 / 0.199 |                   |                   | 0.191/0.189                     |                     |                   | 0.140 / 0.134 |                 |                  | 0.136 / 0.130 |               |                | 0.086 / 0.073           |              |            | 0.058 / 0.045            |               |              |

**Table S1 (continued).** Linear regression results for all variables investigated by sex and APOE status. Markers in CSF

| Predictors                               | CD 40 antigen ng/ml |              |            | Interleukin 16 pg/ml |               |             | Interleukin 3 ng/ml |               |            | Interleukin 6.receptor ng/ml |               |            | Interleukin 8 pg/ml |              |             | Immunoglobulin A mg/ml |               |                   | Intercellular Adhesion Molecule ng/ml |              |              |     |
|------------------------------------------|---------------------|--------------|------------|----------------------|---------------|-------------|---------------------|---------------|------------|------------------------------|---------------|------------|---------------------|--------------|-------------|------------------------|---------------|-------------------|---------------------------------------|--------------|--------------|-----|
|                                          | Estimates           | CI           | adjusted p | Estimates            | CI            | adjusted p  | Estimates           | CI            | adjusted p | Estimates                    | CI            | adjusted p | Estimates           | CI           | adjusted p  | Estimates              | CI            | adjusted p        | Estimates                             | CI           | adjusted p   |     |
| (Intercept)                              | 1.13                | 1.29 – 0.98  |            | 0.35                 | 0.10 – 0.59   |             | -2.96               | -3.38 – -2.54 |            | -0.29                        | -0.48 – -0.10 |            | 1.38                | 1.18 – 1.57  |             | -2.82                  | -3.22 – -2.43 |                   | -0.19                                 | -0.75 – 0.36 |              |     |
| AGE (years)                              | 0.00                | 0.00 – 0.00  |            | 0.00                 | 0.00 – 0.00   |             | 0.00                | 0.00 – 0.02   |            | 0                            | 0.00 – 0.01   |            | 0                   | 0.00 – 0.01  |             | 0                      | -0.00 – 0.01  |                   | 0.01                                  | 0.01 – 0.02  |              |     |
| Male (ref = Female)                      | 0.01                | -0.02 – 0.04 | 0.64       | 0.12                 | 0.06 – 0.18   |             | 0.08                | 0.00 – 0.16   | 0.09       | 0.01                         | -0.02 – 0.05  | 0.57       | 0.1                 | 0.05 – 0.15  | <b>0.01</b> | 0.21                   | 0.14 – 0.29   | <b>&lt;0.0001</b> | 0.18                                  | 0.07 – 0.28  | <b>0.002</b> |     |
| APOE status (ref = 0 alleles)            |                     |              | 0.76       |                      |               |             |                     |               | 0.34       |                              |               | 0.13       |                     |              | 0.33        |                        |               | 0.27              |                                       |              | 0.31         |     |
| 1 allele                                 | 0.01                | -0.02 – 0.03 |            | 0.08                 | 0.01 – 0.16   |             | -0.03               | -0.10 – 0.05  |            | 0.04                         | 0.00 – 0.08   |            | 0.04                | -0.02 – 0.10 |             | 0.02                   | -0.05 – 0.10  |                   | 0.09                                  | -0.01 – 0.20 |              |     |
| 2 alleles                                | 0.02                | -0.03 – 0.06 |            | 0.06                 | -0.04 – 0.16  |             | -0.1                | -0.22 – 0.02  |            | 0.04                         | -0.02 – 0.09  |            | 0.01                | -0.07 – 0.09 |             | -0.09                  | -0.20 – 0.02  |                   | 0.02                                  | -0.13 – 0.18 |              |     |
| Interaction term                         |                     |              |            |                      |               | <b>0.02</b> |                     |               |            |                              |               |            |                     |              |             |                        |               |                   |                                       |              |              |     |
| Male:1 allele                            |                     |              |            | -0.13                | -0.22 – -0.03 |             |                     |               |            |                              |               |            |                     |              |             |                        |               |                   |                                       |              |              |     |
| Male:2 alleles                           |                     |              |            | -0.15                | -0.28 – -0.02 |             |                     |               |            |                              |               |            |                     |              |             |                        |               |                   |                                       |              |              |     |
| Observations                             | 279                 |              |            | 279                  |               |             | 279                 |               |            | 279                          |               |            | 279                 |              |             | 279                    |               |                   | 279                                   |              |              | 279 |
| R <sup>2</sup> / adjusted R <sup>2</sup> | 0.124 / 0.111       |              |            | 0.117 / 0.098        |               |             | 0.081 / 0.068       |               |            | 0.045 / 0.031                |               |            | 0.092 / 0.072       |              |             | 0.135 / 0.122          |               |                   | 0.107 / 0.094                         |              |              |     |

**Table S2.** Linear regression results for all variables investigated by sex and baseline diagnosis. Markers in CSF

| Predictors                               | ADNIMEM       |               |            | ADNIEF        |               |            | ABETA         |                   |            | Hippocampus/Intracranial volume |                     |            | TAU           |                 |            | PTAU          |               |            | Cortisol Cortisol ng/ml |              |            | C Reactive Protein ug/ml |               |            |      |
|------------------------------------------|---------------|---------------|------------|---------------|---------------|------------|---------------|-------------------|------------|---------------------------------|---------------------|------------|---------------|-----------------|------------|---------------|---------------|------------|-------------------------|--------------|------------|--------------------------|---------------|------------|------|
|                                          | Estimates     | CI            | adjusted p | Estimates     | CI            | adjusted p | Estimates     | CI                | adjusted p | Estimates                       | CI                  | adjusted p | Estimates     | CI              | adjusted p | Estimates     | CI            | adjusted p | Estimates               | CI           | adjusted p | Estimates                | CI            | adjusted p |      |
| (Intercept)                              | 1.79          | 1.45 – 2.13   |            | 2.26          | 1.80 – 2.73   |            | 1161.57       | 944.04 – 1379.10  |            | 0.00747                         | 0.00710 – 0.00785   |            | 154.16        | 70.57 – 237.75  |            | 15.72         | 6.36 – 25.09  |            | -1.87                   | -9.56 – 5.81 |            | -3.19                    | -3.93 – -2.45 |            |      |
| AGE (years)                              | -0.01         | -0.01 – -0.00 |            | -0.02         | -0.03 – -0.01 |            | -1.64         | -4.52 – 1.24      |            | -0.00003                        | -0.00004 – -0.00003 |            | 1.25          | 0.15 – 2.36     |            | 0.1           | -0.02 – 0.23  |            | 0.22                    | 0.12 – 0.32  |            | 0.01                     | -0.00 – 0.02  |            |      |
| Male (ref = Female)                      | -0.16         | -0.23 – -0.09 | <0.0001    | -0.04         | -0.13 – 0.05  | <0.0001    | -26.62        | -69.46 – 16.22    | 0.38       | -0.00022                        | -0.00029 – -0.00015 | <0.0001    | -42.59        | -59.05 – -26.13 | <0.0001    | -4.22         | -6.06 – -2.38 | <0.0001    | 1.18                    | -0.25 – 2.61 | 0.22       | -0.1                     | -0.24 – 0.03  | 0.27       |      |
| Diagnosis (ref = CN)                     |               |               | <0.0001    |               |               | <0.0001    |               |                   | <0.0001    |                                 |                     | <0.0001    |               |                 | <0.0001    |               |               | <0.0001    |                         |              |            |                          |               | 0.44       | 0.28 |
| EMCI                                     | -0.5          | -0.61 – -0.39 |            | -0.42         | -0.56 – -0.27 |            | -85.2         | -148.82 – -21.59  |            | -0.00016                        | -0.00027 – -0.00005 |            | 37.85         | 13.41 – 62.30   |            | 4.22          | 1.48 – 6.96   |            |                         |              |            |                          |               |            |      |
| LMCI                                     | -1.08         | -1.16 – -1.00 |            | -0.79         | -0.90 – -0.67 |            | -256.85       | -315.81 – -197.89 |            | -0.00073                        | -0.00083 – -0.00064 |            | 93.34         | 70.69 – 116.00  |            | 10.58         | 8.05 – 13.12  |            | 1.24                    | -0.42 – 2.90 |            | -0.15                    | -0.31 – 0.01  |            |      |
| AD                                       | -1.84         | -1.94 – -1.75 |            | -1.63         | -1.76 – -1.50 |            | -390.48       | -453.59 – -327.37 |            | -0.00106                        | -0.00116 – -0.00096 |            | 143.6         | 119.35 – 167.86 |            | 15.81         | 13.10 – 18.53 |            | 0.24                    | -1.68 – 2.16 |            | -0.15                    | -0.33 – 0.04  |            |      |
| Observations                             |               |               | 1150       |               |               | 1149       |               |                   | 947        |                                 |                     | 1234       |               |                 | 947        |               |               | 947        |                         |              | 279        |                          |               | 279        |      |
| R <sup>2</sup> / adjusted R <sup>2</sup> | 0.589 / 0.588 |               |            | 0.380 / 0.377 |               |            | 0.168 / 0.164 |                   |            | 0.398 / 0.396                   |                     |            | 0.164 / 0.160 |                 |            | 0.156 / 0.152 |               |            | 0.088 / 0.075           |              |            | 0.030 / 0.016            |               |            |      |

**Table S2 (continued).** Linear regression results for all variables investigated by sex and baseline diagnosis. Markers in CSF

| Predictors                               | CD 40 antigen ng/ml |               |            | Interleukin 16 pg/ml |              |            | Interleukin 3 ng/ml |               |            | Interleukin 6.receptor ng/ml |               |            | Interleukin 8 pg/ml |              |            | Immunoglobulin A mg/ml |               |            | Intercellular Adhesion Molecule ng/ml |              |            |
|------------------------------------------|---------------------|---------------|------------|----------------------|--------------|------------|---------------------|---------------|------------|------------------------------|---------------|------------|---------------------|--------------|------------|------------------------|---------------|------------|---------------------------------------|--------------|------------|
|                                          | Estimates           | CI            | adjusted p | Estimates            | CI           | adjusted p | Estimates           | CI            | adjusted p | Estimates                    | CI            | adjusted p | Estimates           | CI           | adjusted p | Estimates              | CI            | adjusted p | Estimates                             | CI           | adjusted p |
| (Intercept)                              | -1.11               | -1.27 – -0.96 |            | 0.42                 | 0.18 – 0.65  |            | -3                  | -3.42 – -2.59 |            | -0.26                        | -0.45 – -0.07 |            | 1.4                 | 1.20 – 1.59  |            | -2.9                   | -3.29 – -2.50 |            | -0.22                                 | -0.77 – 0.33 |            |
| AGE (years)                              | 0.01                | 0.00 – 0.01   |            | 0.01                 | 0.00 – 0.01  |            | 0.01                | 0.00 – 0.02   |            | 0                            | 0.00 – 0.01   |            | 0                   | 0.00 – 0.01  |            | 0                      | -0.00 – 0.01  |            | 0.01                                  | 0.01 – 0.02  |            |
| Male (ref = Female)                      | 0.01                | -0.02 – 0.03  | 0.77       | 0.05                 | 0.01 – 0.10  | 0.06       | 0.08                | 0.01 – 0.16   | 0.11       | 0.01                         | -0.02 – 0.05  | 0.67       | 0.05                | 0.01 – 0.09  | 0.02       | 0.21                   | 0.14 – 0.29   | <0.0001    | 0.17                                  | 0.06 – 0.27  | 0.006      |
| Diagnosis (ref = CN)                     |                     |               | 0.18       |                      |              | 0.64       |                     |               | 0.64       |                              |               | 0.64       |                     |              | 0.96       |                        |               | 0.98       |                                       |              | 0.67       |
| EMCI                                     |                     |               |            |                      |              |            |                     |               |            |                              |               |            |                     |              |            |                        |               |            |                                       |              |            |
| LMCI                                     | 0.01                | -0.03 – 0.04  |            | 0.01                 | -0.04 – 0.06 |            | -0.04               | -0.13 – 0.05  |            | 0.01                         | -0.03 – 0.05  |            | 0.01                | -0.03 – 0.05 |            | 0                      | -0.08 – 0.09  |            | 0.06                                  | -0.06 – 0.18 |            |
| AD                                       | -0.01               | -0.01 – 0.00  |            | -0.01                | -0.01 – 0.00 |            | -0.01               | -0.17 – 0.04  |            | -0.02                        | -0.07 – 0.03  |            | 0.01                | -0.04 – 0.06 |            | -0.01                  | -0.11 – 0.09  |            | 0.02                                  | -0.12 – 0.16 |            |
| Observations                             |                     |               | 279        |                      |              | 279        |                     |               | 279        |                              |               | 279        |                     |              | 279        |                        |               | 279        |                                       |              | 279        |
| R <sup>2</sup> / adjusted R <sup>2</sup> | 0.138 / 0.125       |               |            | 0.089 / 0.075        |              |            | 0.077 / 0.063       |               |            | 0.031 / 0.017                |               |            | 0.059 / 0.045       |              |            | 0.123 / 0.111          |               |            | 0.101 / 0.088                         |              |            |

**Table S3.** Linear regression results for all plasma variables investigated by sex and APOE genotype

| Predictors                               | Interleukin 18 pg/ml |               |              | Cortisol Cortisol ng/ml |              |            | C Reactive Protein ug/ml |               |                   | Intercellular Adhesion Molecule ng/ml |               |            | Immunoglobulin E ng/ml |              |                   | Interleukin 8 pg/ml |              |            |
|------------------------------------------|----------------------|---------------|--------------|-------------------------|--------------|------------|--------------------------|---------------|-------------------|---------------------------------------|---------------|------------|------------------------|--------------|-------------------|---------------------|--------------|------------|
|                                          | Estimates            | CI            | adjusted p   | Estimates               | CI           | adjusted p | Estimates                | CI            | adjusted p        | Estimates                             | CI            | adjusted p | Estimates              | CI           | adjusted p        | Estimates           | CI           | adjusted p |
| (Intercept)                              | 2.41                 | 2.25 – 2.57   |              | 2.04                    | 1.92 – 2.16  |            | 0.06                     | -0.39 – 0.52  |                   | 1.91                                  | 1.78 – 2.04   |            | 1.66                   | 1.18 – 2.14  |                   | 0.79                | 0.62 – 0.96  |            |
| AGE (years)                              | 0                    | -0.00 – 0.00  |              | 0                       | -0.00 – 0.00 |            | 0                        | -0.00 – 0.01  |                   | 0                                     | -0.00 – 0.00  |            | 0                      | -0.01 – 0.01 |                   | 0                   | 0.00 – 0.01  |            |
| Male (ref = Female)                      | 0.06                 | 0.03 – 0.09   | <b>0.002</b> | 0.01                    | -0.01 – 0.04 | 0.54       | -0.15                    | -0.25 – -0.06 | <b>0.009</b>      | -0.04                                 | -0.06 – -0.01 | 0.07       | 0.25                   | 0.15 – 0.34  | <b>&lt;0.0001</b> | -0.01               | -0.04 – 0.03 | 0.82       |
| APOE status (ref = 0 alleles)            |                      |               | 0.29         |                         |              | 0.46       |                          |               | <b>&lt;0.0001</b> |                                       |               | 0.89       |                        |              | 0.49              |                     |              | 0.41       |
| 1 allele                                 | -0.03                | -0.07 – -0.00 |              | 0.01                    | -0.01 – 0.04 |            | -0.28                    | -0.37 – -0.18 |                   | 0.01                                  | -0.02 – 0.04  |            | 0.03                   | -0.06 – 0.13 |                   | -0.03               | -0.07 – 0.00 |            |
| 2 alleles                                | -0.04                | -0.09 – 0.01  |              | 0.03                    | -0.00 – 0.07 |            | -0.36                    | -0.50 – -0.23 |                   | 0                                     | -0.04 – 0.04  |            | -0.1                   | -0.25 – 0.04 |                   | -0.03               | -0.09 – 0.02 |            |
| Observations                             |                      |               | 526          |                         |              | 527        |                          |               | 526               |                                       |               | 527        |                        |              | 527               |                     |              | 527        |
| R <sup>2</sup> / adjusted R <sup>2</sup> | 0.038 / 0.031        |               |              | 0.014 / 0.007           |              |            | 0.105 / 0.098            |               |                   | 0.019 / 0.012                         |               |            | 0.056 / 0.048          |              |                   | 0.027 / 0.019       |              |            |

bioRxiv preprint doi: <https://doi.org/10.1101/741777>; this version posted August 23, 2019. The copyright holder for this preprint (which was not certified by peer review) is the author/funder, who has granted bioRxiv a license to display the preprint in perpetuity. It is made available under aCC-BY-NC-ND 4.0 International license.

**Table S3 (continued).** Linear regression results for all plasma variables investigated by sex and APOE genotype

| Predictors                               | CD 40 antigen ng/ml |               |            | Interleukin 16.IL 16.pg m |              |            | Interleukin 3 ng/ml |               |            | Interleukin 6 receptor ng/ml |               |            | Immunoglobulin A mg/ml |              |            |
|------------------------------------------|---------------------|---------------|------------|---------------------------|--------------|------------|---------------------|---------------|------------|------------------------------|---------------|------------|------------------------|--------------|------------|
|                                          | Estimates           | CI            | adjusted p | Estimates                 | CI           | adjusted p | Estimates           | CI            | adjusted p | Estimates                    | CI            | adjusted p | Estimates              | CI           | adjusted p |
| (Intercept)                              | -0.58               | -0.68 – -0.47 |            | 2.32                      | 2.18 – 2.47  |            | -1.71               | -1.98 – -1.45 |            | 1.42                         | 1.30 – 1.55   |            | 0.48                   | 0.28 – 0.69  |            |
| AGE (years)                              | 0.01                | 0.00 – 0.01   |            | 0                         | 0.00 – 0.00  |            | 0                   | -0.00 – 0.00  |            | 0                            | -0.00 – 0.00  |            | 0                      | -0.00 – 0.00 |            |
| Male (ref = Female)                      | -0.01               | -0.03 – 0.01  | 0.63       | 0.01                      | -0.02 – 0.04 | 0.71       | 0                   | -0.06 – 0.05  | 0.92       | -0.03                        | -0.05 – -0.00 | 0.19       | 0.02                   | -0.02 – 0.06 | 0.66       |
| APOE status (ref = 0 alleles)            |                     |               | 0.66       |                           |              | 0.75       |                     |               | 0.76       |                              |               | 0.54       |                        |              | 0.71       |
| 1 allele                                 | -0.01               | -0.03 – 0.01  |            | -0.02                     | -0.05 – 0.01 |            | 0.01                | -0.05 – 0.06  |            | 0.01                         | -0.01 – 0.04  |            | -0.01                  | -0.05 – 0.03 |            |
| 2 alleles                                | 0.01                | -0.02 – 0.04  |            | -0.01                     | -0.06 – 0.03 |            | 0.04                | -0.03 – 0.12  |            | -0.02                        | -0.06 – 0.02  |            | -0.04                  | -0.10 – 0.02 |            |
| Observations                             |                     |               | 526        |                           |              | 527        |                     |               | 527        |                              |               | 527        |                        |              | 527        |
| R <sup>2</sup> / adjusted R <sup>2</sup> | 0.133 / 0.126       |               |            | 0.023 / 0.015             |              |            | 0.002 / -0.005      |               |            | 0.016 / 0.008                |               |            | 0.009 / 0.002          |              |            |

**Table S4.** Linear regression results for all plasma variables investigated by sex and baseline diagnosis.

| Predictors                               | Interleukin 18 pg/ml |              |              | Cortisol Cortisol ng/ml |              |             | C Reactive Protein ug/ml |               |             | Intercellular Adhesion Molecule ng/ml |               |              | Immunoglobulin E ng/ml |              |                   | Interleukin 8 pg/ml |              |            |
|------------------------------------------|----------------------|--------------|--------------|-------------------------|--------------|-------------|--------------------------|---------------|-------------|---------------------------------------|---------------|--------------|------------------------|--------------|-------------------|---------------------|--------------|------------|
|                                          | Estimates            | CI           | adjusted p   | Estimates               | CI           | adjusted p  | Estimates                | CI            | adjusted p  | Estimates                             | CI            | adjusted p   | Estimates              | CI           | adjusted p        | Estimates           | CI           | adjusted p |
| (Intercept)                              | 2.33                 | 2.17 – 2.50  | 0.005        | 1.98                    | 1.96 – 2.00  | 0.007       | -0.56                    | -0.41         | 1.92        | 1.78 – 2.05                           | 1.6           | 1.11 – 2.09  | 0.78                   | 0.61 – 0.96  |                   |                     |              |            |
| AGE (years)                              | 0                    | -0.00 – 0.00 |              | 0                       | -0.00 – 0.00 |             | 0.01                     | 0.00 – 0.01   | 0           | -0.00 – 0.00                          | 0             | -0.01 – 0.01 | 0                      | 0.00 – 0.01  |                   |                     |              |            |
| Male (ref = Female)                      | 0.06                 | 0.03 – 0.09  | <b>0.005</b> | 0.02                    | -0.01 – 0.04 | 0.47        | -0.14                    | -0.24 – -0.05 | <b>0.03</b> | -0.03                                 | -0.06 – -0.01 | 0.08         | 0.25                   | 0.15 – 0.34  | <b>&lt;0.0001</b> | 0                   | -0.04 – 0.03 | 0.88       |
| Diagnosis (ref = CN)                     |                      |              | 0.63         |                         |              | <b>0.01</b> |                          |               | 0.08        |                                       | 0.27          |              | 0.88                   |              |                   |                     |              | 0.35       |
| LMCI                                     | 0.04                 | -0.01 – 0.10 |              | -0.02                   | -0.07 – 0.02 |             | -0.26                    | -0.44 – -0.09 |             | -0.01                                 | -0.06 – 0.03  |              | -0.01                  | -0.18 – 0.17 |                   | -0.04               | -0.10 – 0.02 |            |
| AD                                       | 0.03                 | -0.03 – 0.10 |              | 0.03                    | -0.02 – 0.08 |             | -0.22                    | -0.41 – -0.03 |             | 0.02                                  | -0.03 – 0.08  |              | -0.04                  | -0.23 – 0.16 |                   | 0                   | -0.07 – 0.06 |            |
| Observations                             | 527                  |              |              | 527                     |              |             | 526                      |               |             | 527                                   |               |              | 527                    |              |                   | 527                 |              |            |
| R <sup>2</sup> / adjusted R <sup>2</sup> | 0.032 / 0.025        |              |              | 0.034 / 0.026           |              |             | 0.043 / 0.036            |               |             | 0.029 / 0.021                         |               |              | 0.050 / 0.043          |              |                   | 0.027 / 0.020       |              |            |

**Table S4 (continued).** Linear regression results for all plasma variables investigated by sex and baseline diagnosis.

| Predictors                               | CD 40 antigen ng/ml |               |            | Interleukin 16 pg/ml |               |            | Interleukin 3 ng/ml |               |            | Interleukin 6 receptor ng/ml |               |            | Immunoglobulin A mg/ml |              |            |
|------------------------------------------|---------------------|---------------|------------|----------------------|---------------|------------|---------------------|---------------|------------|------------------------------|---------------|------------|------------------------|--------------|------------|
|                                          | Estimates           | CI            | adjusted p | Estimates            | CI            | adjusted p | Estimates           | CI            | adjusted p | Estimates                    | CI            | adjusted p | Estimates              | CI           | adjusted p |
| (Intercept)                              | -0.56               | -0.67 – -0.46 |            | 2.38                 | 2.23 – 2.53   |            | -1.62               | -1.89 – -1.35 |            | 1.44                         | 1.32 – 1.56   |            | 0.42                   | 0.22 – 0.63  |            |
| AGE (years)                              | 0.01                | 0.00 – 0.01   |            | 0                    | 0.00 – 0.00   |            | 0                   | -0.00 – 0.00  |            | 0                            | -0.00 – 0.00  |            | 0                      | -0.00 – 0.00 |            |
| Male (ref = Female)                      | -0.01               | -0.03 – 0.01  | 0.68       | 0.01                 | -0.02 – 0.04  | 0.63       | -0.01               | -0.06 – 0.05  | 0.52       | -0.02                        | -0.05 – -0.00 | 0.19       | 0.02                   | -0.02 – 0.06 | 0.68       |
| Diagnosis (ref = CN)                     |                     |               | 0.08       |                      |               | 0.08       |                     |               | 0.75       |                              | 0.63          |            |                        |              | 0.84       |
| LMCI                                     | -0.02               | -0.05 – 0.02  |            | -0.08                | -0.13 – -0.02 |            | -0.04               | -0.14 – 0.06  |            | -0.03                        | -0.08 – 0.01  |            | 0.03                   | -0.05 – 0.10 |            |
| AD                                       | 0.02                | -0.02 – 0.06  |            | -0.08                | -0.14 – -0.02 |            | -0.12               | -0.22 – -0.01 |            | -0.03                        | -0.08 – 0.02  |            | 0.02                   | -0.07 – 0.10 |            |
| Observations                             | 526                 |               |            | 527                  |               |            | 527                 |               |            | 527                          |               |            | 527                    |              |            |
| R <sup>2</sup> / adjusted R <sup>2</sup> | 0.143 / 0.137       |               |            | 0.036 / 0.029        |               |            | 0.013 / 0.006       |               |            | 0.014 / 0.006                |               |            | 0.008 / -0.000         |              |            |
